# Supplementary material
Source: Elsevier journal article supplement (https://comptes-rendus.academie-sciences.fr/physique/article/10.1016/j.crhy.2019.05.016/file/attach/mmc1.pdf)
Supplement: mmc1 [file mmc1.pdf]

## Clusters ID Cards

This document gathers the “ID Cards” of the BC clusters found within the studied database.

The BC network was built by linking pairs of publications based on the references they share. We only kept links between publications sharing more than 3 references - 5831 out of 7890 publications are in the network. The 8 clusters presented here correspond to the ones found in the top level grouping at least 30 publications. They gather a total of 5555 publications.

These ID cards displays the most frequent keywords, subject categories, journals of publication, institutions, countries, authors, references and reference journals of the publications of each cluster. The significance of an item  $\sigma = \sqrt{N}(f - p)/\sqrt{p(1 - p)}$  - where  $N$  is the number of publications within the cluster and  $f$  and  $p$  are the proportion of publications respectively within the cluster and within the database displaying that item - is also given.

Figure 1: **Top clusters network.** The sizes of the nodes correspond to the number of publications in each cluster, their color to the top cluster they belong to. The edges reflect shared references between clusters: the thicker an edge between two clusters, the more references they share. Labels correspond to the most significant used keyword.

**Quantitative characteristics of the clusters.**  $N$  is the number of publications within the cluster,  $\langle N_{ref} \rangle$  the average number of references per publication. The cohesiveness of the cluster can be measured by: the average degree  $k$  of its publications (i.e. average number of links within the cluster per publication), its density in terms of BC links  $d = 2k/(N - 1)$ , the weighted density  $\langle \omega_{in} \rangle$ , the inner modularity  $Q_i$  obtained when splitting the cluster in a sub-partition, and the module  $q$  of the cluster within the partition. To quantify how a cluster can concentrate on a given number of references, we also display the h-index  $h_{ref}$  ( $h$  references are cited by at least  $h$  publications of the cluster) and the numbers  $nr_{10}$ ,  $nr_5$ ,  $nr_2$ , where  $nr_x$  is the number of references cited by at least  $x\%$  of publications within the cluster. To estimate the 'hotness' of a cluster, we display the average publication year of the publications within the cluster  $\langle PY \rangle$ , the average age of the references used in the cluster  $\langle A \rangle_{refs}$ , the average number of citation per publication (according to Web Of Science)  $\langle N_{cit} \rangle$ , the h index  $h$  of the cluster ( $h$  publications have been cited at least  $h$  times).

| Corpus     | $N$  | $\langle N_{ref} \rangle$ | $k$    | $d$   | $\langle \omega_{in} \rangle * 10^3$ | $Q_i$ | $q$   | $h_{ref}$ | $nr_{10}/nr_5/nr_2$ | $\langle PY \rangle$ | $\langle A \rangle_{refs}$ | $\langle N_{cit} \rangle$ | $h$ |
|------------|------|---------------------------|--------|-------|--------------------------------------|-------|-------|-----------|---------------------|----------------------|----------------------------|---------------------------|-----|
| All in BC  | 5831 | 39.91                     | 182.83 | 0.063 | 1.682                                | 0.556 | -     | -         | -                   | 2011.98              | 11.16                      | 26.02                     | 135 |
| Cluster 2  | 1623 | 42.67                     | 229.64 | 0.283 | 14.543                               | 0.221 | 0.169 | 67        | 11/48/176           | 2012.44              | 9.67                       | 44.23                     | 96  |
| Cluster 1  | 1284 | 37.56                     | 45.39  | 0.071 | 4.099                                | 0.520 | 0.055 | 48        | 4/27/130            | 2009.31              | 13.52                      | 16.81                     | 66  |
| Cluster 4  | 1191 | 35.79                     | 114.83 | 0.193 | 11.275                               | 0.312 | 0.108 | 51        | 11/38/174           | 2012.88              | 12.17                      | 13.31                     | 53  |
| Cluster 3  | 640  | 47.94                     | 321.56 | 1.006 | 67.005                               | 0.097 | 0.170 | 63        | 56/148/376          | 2013.32              | 9.53                       | 25.03                     | 61  |
| Cluster 13 | 299  | 39.93                     | 107.65 | 0.722 | 48.144                               | 0.090 | 0.034 | 30        | 29/72/244           | 2013.72              | 9.63                       | 35.31                     | 36  |
| Cluster 26 | 279  | 42.13                     | 43.11  | 0.310 | 20.430                               | 0.218 | 0.014 | 21        | 14/50/186           | 2013.37              | 11.74                      | 28.22                     | 36  |
| Cluster 25 | 152  | 35.08                     | 20.49  | 0.271 | 18.451                               | 0.361 | 0.004 | 17        | 17/49/193           | 2013.70              | 8.77                       | 21.53                     | 25  |
| Cluster 10 | 87   | 33.20                     | 10.60  | 0.246 | 20.386                               | 0.649 | 0.001 | 10        | 17/75/425           | 2010.30              | 13.88                      | 14.29                     | 21  |

Cluster 2 (“COMPLEX NETWORKS”). This cluster contains  $N = 1623$  publications.

| Keywords             | f(%)  | $\sigma$ | Institution              | f(%)  | $\sigma$ | Reference                                        | f(%)  | $\sigma$ |
|----------------------|-------|----------|--------------------------|-------|----------|--------------------------------------------------|-------|----------|
| COMPLEX NETWORKS     | 38.45 | 25.85    | DEPT PHYS                | 19.72 | 6.09     | Barabasi AL, 1999, SCIENCE, 286, 509             | 41.16 | 33.34    |
| DYNAMICS             | 27.60 | 3.10     | DEPT MATH                | 5.05  | 1.60     | Watts DJ, 1998, NATURE, 393, 440                 | 40.48 | 34.86    |
| SOCIAL NETWORKS      | 17.68 | 14.55    | UNIV ELECT SCI & TECHNOL | 4.07  | 8.22     | Albert R, 2002, REV MOD PHYS, 74, 47             | 34.75 | 31.73    |
| MODEL                | 12.32 | -0.75    | CHINA                    |       |          | Newman MEJ, 2003, SIAM REV, 45, 167              | 26.93 | 29.23    |
| SMALL-WORLD NETWORKS | 9.61  | 12.35    | SCH MATH SCI             | 3.51  | 6.08     | Pastor-Satorras R, 2001, PHYS REV LETT, 86, 3200 | 22.24 | 30.78    |
| NETWORKS             | 7.27  | -2.09    | DEPT COMP SCI            | 3.45  | 3.72     | Castellano C, 2009, REV MOD PHYS, 81, 591        | 20.76 | 1.86     |
| SCALE-FREE NETWORKS  | 7.15  | 10.00    | DEPT FIS                 | 3.08  | 1.18     | Newman MEJ, 2001, PHYS REV E, 64, 0              | 18.48 | 26.71    |
| BEHAVIOR             | 6.90  | -0.84    | BOSTON UNIV              | 2.96  | 3.18     | Boccaletti S, 2006, PHYS REP, 424, 175           | 17.25 | 20.40    |
| EVOLUTION            | 6.90  | 0.63     | CTR POLYMER STUDIES      | 2.90  | 3.88     | Newman MEJ, 2002, PHYS REV LETT, 89, 0           | 12.32 | 21.44    |
| SYSTEMS              | 5.61  | -1.56    | WEB SCI CTR              | 2.83  | 7.22     | Newman M, 2010, NETWORKS INTRO                   | 10.84 | 16.74    |
| INTERNET             | 5.30  | 11.98    | SCH SCI                  | 2.71  | 2.17     | Newman MEJ, 2002, PHYS REV E, 66, 0              | 10.72 | 21.35    |
| MODELS               | 4.99  | 1.98     | SCH MANAGEMENT           | 2.40  | 3.24     | Erdos P, 1959, PUBL MATH-DEBRECEN, 6, 290        | 9.80  | 16.53    |
| WEB                  | 4.93  | 10.28    | BEIHANG UNIV             | 2.22  | 5.64     | Albert R, 2000, NATURE, 406, 378                 | 9.67  | 19.74    |
| COMMUNITY STRUCTURE  | 4.87  | 7.11     | BEIJING NORMAL UNIV      | 2.16  | 5.02     | Dorogovtsev SN, 2002, ADV PHYS, 51, 1079         | 9.61  | 19.48    |
| CENTRALITY           | 4.68  | 9.89     | SANTA FE INST            | 2.16  | 4.36     | Girvan M, 2002, P NATL ACAD SCI USA, 99, 7821    | 9.43  | 9.67     |
| SPREAD               | 4.44  | 10.79    | INST THEORET PHYS        | 2.09  | -0.72    | Newman MEJ, 2001, P NATL ACAD SCI USA, 98, 404   | 9.24  | 16.99    |
| EMERGENCE            | 3.88  | -1.82    | NORTHEASTERN UNIV        | 2.09  | 5.03     | Strogatz SH, 2001, NATURE, 410, 268              | 9.24  | 17.76    |
| ORGANIZATION         | 3.39  | 4.92     | BIG DATA RES CTR         | 2.03  | 7.35     | Barrat A, 2008, DYNAMICAL PROCESSES              | 9.12  | 16.60    |
| DIFFUSION            | 3.27  | 4.34     | UNIV ZARAGOZA            | 2.03  | 3.58     | Kitsak M, 2010, NAT PHYS, 6, 888                 | 8.81  | 18.63    |
| SMALL-WORLD          | 3.27  | 10.21    | CNRS                     | 1.91  | -0.12    | Amaral LAN, 2000, P NATL ACAD SCI USA, 97, 11149 | 7.70  | 16.85    |
| DEPT ELECT ENGN      | 1.91  | 2.84     | DEPT ELECT ENGN          | 1.91  | 2.84     |                                                  |       |          |
| Title Words          | f(%)  | $\sigma$ | Country                  | f(%)  | $\sigma$ | RefJournal                                       | f(%)  | $\sigma$ |
| NETWORKS             | 52.68 | 35.93    | Peoples R China          | 37.58 | 11.20    | PHYS REV E                                       | 89.28 | 24.57    |
| SOCIAL               | 24.28 | 10.67    | USA                      | 23.97 | 3.67     | PHYS REV LETT                                    | 77.33 | 23.61    |
| NETWORK              | 18.48 | 18.36    | UK                       | 9.06  | 2.69     | NATURE                                           | 73.75 | 22.78    |
| COMPLEX              | 16.64 | 18.83    | Italy                    | 8.81  | 1.60     | SCIENCE                                          | 68.52 | 27.60    |
| MODEL                | 13.74 | 0.56     | Spain                    | 7.95  | 4.72     | P NATL ACAD SCI USA                              | 63.65 | 22.21    |
| SPREADING            | 9.49  | 19.27    | Germany                  | 6.59  | -0.55    | PHYSICA A                                        | 60.81 | 6.83     |
| DYNAMICS             | 9.18  | 0.04     | Brazil                   | 4.31  | -1.01    | REV MOD PHYS                                     | 54.71 | 19.43    |
| INFORMATION          | 7.64  | 7.93     | Switzerland              | 4.07  | 3.03     | EUR PHYS J B                                     | 38.45 | 5.59     |
| BASED                | 5.55  | 1.55     | France                   | 3.51  | -1.52    | SIAM REV                                         | 34.75 | 28.36    |
| EPIDEMIC             | 5.48  | 15.06    | Israel                   | 3.51  | 4.87     | PHYS REP                                         | 33.70 | 12.61    |
| Journal              | f(%)  | $\sigma$ | Author                   | f(%)  | $\sigma$ | Subject                                          | f(%)  | $\sigma$ |
| PHYSICA A            | 26.43 | 1.37     | Stanley HE               | 1.97  | 2.90     | Physics, Multidisciplinary                       | 51.76 | 1.17     |
| PHYS REV E           | 19.84 | 10.94    | Wang W                   | 1.66  | 8.40     | Physics, Mathematical                            | 36.66 | 9.28     |
| EPL-EUROPHYS LETT    | 3.88  | 4.14     | Zhou T                   | 1.66  | 5.23     | Physics, Fluids & Plasmas                        | 20.70 | 9.93     |
| EUR PHYS J B         | 3.88  | 2.98     | Havlin S                 | 1.48  | 5.24     | Physics, Condensed Matter                        | 6.28  | 0.87     |
| INT J MOD PHYS C     | 3.27  | 0.87     | Bianconi G               | 1.42  | 7.89     | Multidisciplinary Sciences                       | 4.93  | 3.20     |
| J STAT MECH-THEORY E | 2.96  | 1.63     | Latora V                 | 1.17  | 5.01     | Mathematics, Applied                             | 4.81  | -1.82    |
| NEW J PHYS           | 2.96  | 4.20     | Newman MEJ               | 1.11  | 5.89     | Computer Science, Interdisciplinary Applications | 3.88  | -0.58    |
| CHAOS                | 2.65  | 5.57     | Tang M                   | 1.11  | 6.59     | Mechanics                                        | 3.82  | 0.09     |
| PHYS REV LETT        | 2.28  | 3.58     | Moreno Y                 | 1.05  | 3.07     | Physics, Applied                                 | 3.39  | -13.82   |
| ACTA PHYS SIN-CH ED  | 1.97  | 5.51     | Gomez-Gardenes J         | 0.99  | 3.41     | Mathematics, Interdisciplinary Applications      | 2.59  | -3.25    |

**Cluster 2 (“COMPLEX NETWORKS”).** Most cited publications (according to Web Of Science) and most representative publications (in term of in-degree  $d_{in}$  measuring the number of publications in the cluster that are linked with it) among all publications in the cluster.

|          |             |                                            | <b>Most Cited publications</b>                                                                        |  |
|----------|-------------|--------------------------------------------|-------------------------------------------------------------------------------------------------------|--|
| $d_{in}$ | Times Cited | Publication Ref                            | Publication Title                                                                                     |  |
| 1289     | 5052        | Boccaletti S, 2006, PHYS REP(424)          | Complex networks: Structure and dynamics                                                              |  |
| 638      | 4520        | Newman MEJ, 2004, PHYS REV E(69)           | Finding and evaluating community structure in networks                                                |  |
| 283      | 2747        | Pastor-Satorras R, 2001, PHYS REV LETT(86) | Epidemic spreading in scale-free networks                                                             |  |
| 525      | 2482        | Newman MEJ, 2001, PHYS REV E(64)           | Random graphs with arbitrary degree distributions and their applications                              |  |
| 517      | 2093        | Newman MEJ, 2002, PHYS REV LETT(89)        | Assortative mixing in networks                                                                        |  |
| 91       | 2053        | Newman MEJ, 2005, CONTEMP PHYS(46)         | Power laws, Pareto distributions and Zipf’s law                                                       |  |
| 862      | 1802        | Dorogovtsev SN, 2002, ADV PHYS(51)         | Evolution of networks                                                                                 |  |
| 853      | 1643        | Arenas A, 2008, PHYS REP(469)              | Synchronization in complex networks                                                                   |  |
| 335      | 1610        | Newman MEJ, 2002, PHYS REV E(66)           | Email networks and the spread of computer viruses                                                     |  |
| 592      | 1610        | Newman MEJ, 2002, PHYS REV E(66)           | Spread of epidemic disease on networks                                                                |  |
| 61       | 1331        | Barabasi AL, 1999, PHYSICA A(272)          | Mean-field theory for scale-free random networks                                                      |  |
| 83       | 1196        | Callaway DS, 2000, PHYS REV LETT(85)       | Network robustness and fragility: Percolation on random graphs                                        |  |
| 612      | 1139        | Barabasi AL, 2002, PHYSICA A(311)          | Evolution of the social network of scientific collaborations                                          |  |
| 869      | 1064        | Newman MEJ, 2003, PHYS REV E(67)           | Mixing patterns in networks                                                                           |  |
|          |             |                                            | <b>Most Representative Publications</b>                                                               |  |
| $d_{in}$ | Times Cited | Publication Ref                            | Publication Title                                                                                     |  |
| 1336     | 501         | Pastor-Satorras R, 2015, REV MOD PHYS(87)  | Epidemic processes in complex networks                                                                |  |
| 1289     | 5052        | Boccaletti S, 2006, PHYS REP(424)          | Complex networks: Structure and dynamics                                                              |  |
| 1287     | 195         | Wang Z, 2016, PHYS REP(664)                | Statistical physics of vaccination                                                                    |  |
| 1242     | 228         | Costa LD, 2011, ADV PHYS(60)               | Analyzing and modeling real-world phenomena with complex networks: a survey of applications           |  |
| 1131     | 810         | Boccaletti S, 2014, PHYS REP(544)          | The structure and dynamics of multilayer networks                                                     |  |
| 1117     | 73          | Pei S, 2013, J STAT MECH-THEORY E()        | Spreading dynamics in complex networks                                                                |  |
| 1051     | 756         | Barthelemy M, 2011, PHYS REP(499)          | Spatial networks                                                                                      |  |
| 1033     | 59          | Zhang ZK, 2016, PHYS REP(651)              | Dynamics of information diffusion and its applications on complex networks                            |  |
| 1018     | 81          | Havlin S, 2012, EUR PHYS J-SPEC TOP(214)   | Challenges in network science: Applications to infrastructures, climate, social systems and economics |  |
| 998      | 459         | Gao JX, 2012, NAT PHYS(8)                  | Networks formed from interdependent networks                                                          |  |
| 990      | 0           | Bohme GA, 2013, EUR PHYS J-SPEC TOP(222)   | Emergence and persistence of diversity in complex networks                                            |  |
| 983      | 17          | Zheng XL, 2012, FRONT COMPUT SCI-CHI(6)    | Social influence and spread dynamics in social networks                                               |  |
| 976      | 0           | Diaz-Guilera A, 2007, AIP CONF PROC(885)   | Complex networks: Statics and dynamics                                                                |  |
| 944      | 334         | Lu LY, 2012, PHYS REP(519)                 | Recommender systems                                                                                   |  |

**Cluster 2 (“COMPLEX NETWORKS”).** Most cited and representative authors. For each author, we display the number  $N_a$  of publications their authored in that cluster, the sum  $TC_a$  of their number of citations (according to Web Of Science), and the sum  $k_a$  of their in-degree.

| <b>Most Cited Authors</b> |       |        |       |
|---------------------------|-------|--------|-------|
| <b>Author</b>             | $N_a$ | $TC_a$ | $k_a$ |
| Newman MEJ                | 18    | 20099  | 7080  |
| Moreno Y                  | 17    | 7957   | 6438  |
| Latora V                  | 19    | 6235   | 6019  |
| Boccaletti S              | 12    | 5996   | 5711  |
| Watts DJ                  | 6     | 5600   | 754   |
| Chavez M                  | 2     | 5066   | 1352  |
| Hwang DU                  | 1     | 5052   | 1289  |
| Vespignani A              | 9     | 4977   | 4296  |
| Girvan M                  | 3     | 4721   | 1168  |
| Pastor-Satorras R         | 12    | 4693   | 5505  |
| Barabasi AL               | 12    | 4039   | 3392  |
| Strogatz SH               | 2     | 3678   | 608   |
| Arenas A                  | 13    | 3139   | 3366  |
| Jeong H                   | 9     | 2647   | 2428  |
| Diaz-Guilera A            | 7     | 2612   | 3432  |
| Bianconi G                | 23    | 2234   | 6791  |
| Zhou T                    | 27    | 2219   | 10278 |
| Kurths J                  | 14    | 1986   | 5050  |
| Lu LY                     | 11    | 1955   | 4385  |

| <b>Most Representative Authors</b> |       |        |       |
|------------------------------------|-------|--------|-------|
| <b>Author</b>                      | $N_a$ | $TC_a$ | $k_a$ |
| Zhou T                             | 27    | 2219   | 10278 |
| Havlin S                           | 24    | 1916   | 8765  |
| Stanley HE                         | 32    | 1640   | 8112  |
| Zhang ZK                           | 16    | 678    | 7090  |
| Newman MEJ                         | 18    | 20099  | 7080  |
| Bianconi G                         | 23    | 2234   | 6791  |
| Wang W                             | 27    | 165    | 6693  |
| Moreno Y                           | 17    | 7957   | 6438  |
| Latora V                           | 19    | 6235   | 6019  |
| Boccaletti S                       | 12    | 5996   | 5711  |
| Pastor-Satorras R                  | 12    | 4693   | 5505  |
| Tang M                             | 18    | 243    | 5502  |
| Liu C                              | 15    | 294    | 5474  |
| Vicsek T                           | 12    | 1754   | 5447  |
| Lai YC                             | 14    | 399    | 5383  |
| Costa LD                           | 12    | 1263   | 5334  |
| Kurths J                           | 14    | 1986   | 5050  |
| Rodrigues FA                       | 7     | 1266   | 4959  |
| Pei S                              | 14    | 318    | 4941  |

Cluster 1 (“FLUCTUATIONS”). This cluster contains  $N = 1284$  publications.

| Keywords              | f(%)  | $\sigma$ | Institution                  | f(%)  | $\sigma$ | Reference                                        | f(%)  | $\sigma$ |
|-----------------------|-------|----------|------------------------------|-------|----------|--------------------------------------------------|-------|----------|
| DYNAMICS              | 16.59 | -6.44    | DEPT PHYS                    | 23.05 | 8.83     | Mantegna RN, 1995, NATURE, 376, 46               | 17.91 | 30.99    |
| MODEL                 | 14.41 | 1.55     | DEPT ECON                    | 6.23  | 10.68    | Mandelbrot B, 1963, J BUS, 36, 394               | 11.53 | 24.82    |
| FLUCTUATIONS          | 12.93 | 20.62    | BOSTON UNIV                  | 5.45  | 9.40     | Mantegna RN, 2000, INTRO ECONOPHYSICS C          | 11.53 | 24.48    |
| VOLATILITY            | 9.58  | 18.96    | CTR POLYMER STUDIES          | 4.91  | 9.08     | Mantegna RN, 1999, INTRO ECONOPHYSICS C          | 10.12 | 20.98    |
| FINANCIAL-MARKETS     | 9.42  | 16.85    | INST THEORET PHYS            | 4.75  | 5.62     | Gopikrishnan P, 1999, PHYS REV E, 60, 5305       | 9.97  | 22.64    |
| STOCK-MARKET          | 8.80  | 18.33    | SCH BUSINESS                 | 4.44  | 9.75     | Peng CK, 1994, PHYS REV E, 49, 1685              | 9.97  | 22.06    |
| BEHAVIOR              | 8.33  | 1.20     | INST PHYS                    | 4.13  | 5.49     | Liu YH, 1999, PHYS REV E, 60, 1390               | 9.03  | 21.97    |
| TIME-SERIES           | 8.02  | 14.84    | DEPT MATH                    | 3.82  | -0.77    | Lux T, 1999, NATURE, 397, 498                    | 8.41  | 20.02    |
| DISTRIBUTIONS         | 7.63  | 12.36    | SCH SCI                      | 3.58  | 4.18     | Bouchaud J P, 2000, THEORY FINANCIAL RIS         | 7.63  | 20.41    |
| MARKET                | 7.24  | 14.62    | E CHINA UNIV SCI & TECHNOL   | 3.35  | 9.93     | Plerou V, 1999, PHYS REV LETT, 83, 1471          | 6.93  | 18.57    |
| LAW                   | 6.62  | 12.75    | RES CTR ECONOPHYS            | 3.35  | 11.86    | Challet D, 1997, PHYSICA A, 246, 407             | 6.78  | 16.33    |
| STATISTICAL-MECHANICS | 6.46  | 7.29     | DEPT FIS                     | 2.80  | 0.43     | Dragulescu A, 2000, EUR PHYS J B, 17, 723        | 6.70  | 17.16    |
| RETURNS               | 5.92  | 14.75    | CNRS                         | 1.95  | -0.01    | Gabaix X, 2003, NATURE, 423, 267                 | 6.62  | 17.96    |
| SYSTEMS               | 5.84  | -1.04    | DIPARTIMENTO FIS             | 1.79  | 2.59     | Gopikrishnan P, 1998, EUR PHYS J B, 3, 139       | 6.54  | 18.72    |
| ECONOMICS             | 5.69  | 9.76     | UNIV COLOGNE                 | 1.79  | 5.20     | Mantegna RN, 1999, EUR PHYS J B, 11, 193         | 6.54  | 16.30    |
| MONEY                 | 5.45  | 13.95    | DEPT FINANCE                 | 1.71  | 9.28     | Dragulescu A, 2001, PHYSICA A, 299, 213          | 6.23  | 17.65    |
| INCOME                | 5.06  | 13.52    | INST FIS                     | 1.71  | 0.37     | Pareto V, 1897, COURS EC POLITIQUE               | 6.15  | 17.24    |
| MARKETS               | 4.98  | 11.54    | UNIV CALIF LOS ANGELES       | 1.64  | 4.39     | Fama EF, 1970, J FINANC, 25, 383                 | 6.07  | 17.87    |
| ECONOPHYSICS          | 4.91  | 12.70    | CTR BRASILEIRO PESQUISAS FIS | 1.56  | 7.31     | Black F, 1973, J POLIT ECON, 81, 637             | 6.00  | 16.16    |
| WEALTH                | 4.44  | 12.10    | INFM                         | 1.56  | 4.15     | Cont R, 2000, MACROECON DYN, 4, 170              | 5.92  | 15.27    |
| Title Words           | f(%)  | $\sigma$ | Country                      | f(%)  | $\sigma$ | RefJournal                                       | f(%)  | $\sigma$ |
| MARKET                | 16.04 | 25.23    | USA                          | 19.47 | -0.75    | PHYSICA A                                        | 87.15 | 24.97    |
| STOCK                 | 15.81 | 27.90    | Peoples R China              | 16.90 | -7.05    | PHYS REV E                                       | 66.20 | 5.02     |
| FINANCIAL             | 13.40 | 24.32    | Italy                        | 11.21 | 4.65     | EUR PHYS J B                                     | 56.07 | 18.51    |
| MARKETS               | 10.75 | 21.77    | Germany                      | 10.83 | 5.47     | PHYS REV LETT                                    | 50.78 | 1.96     |
| MODEL                 | 10.59 | -2.83    | Brazil                       | 6.93  | 3.47     | NATURE                                           | 44.16 | -1.03    |
| ANALYSIS              | 8.41  | 4.16     | Japan                        | 6.54  | 3.37     | P NATL ACAD SCI USA                              | 25.93 | -8.23    |
| DISTRIBUTION          | 7.01  | 12.81    | UK                           | 6.23  | -1.50    | INTRO ECONOPHYSICS C                             | 25.08 | 33.27    |
| TIME                  | 7.01  | 11.47    | Poland                       | 5.06  | 1.70     | ECONOMETRICA                                     | 21.50 | 21.20    |
| DYNAMICS              | 6.54  | -3.24    | France                       | 4.75  | 0.84     | QUANT FINANC                                     | 20.17 | 28.74    |
| STATISTICAL           | 6.07  | 9.44     | South Korea                  | 3.82  | 2.88     | EUROPHYS LETT                                    | 18.93 | 6.98     |
| Journal               | f(%)  | $\sigma$ | Author                       | f(%)  | $\sigma$ | Subject                                          | f(%)  | $\sigma$ |
| PHYSICA A             | 58.64 | 27.90    | Stanley HE                   | 4.05  | 9.44     | Physics, Multidisciplinary                       | 77.80 | 19.71    |
| PHYS REV E            | 5.30  | -6.76    | Zhou WX                      | 4.05  | 13.73    | Physics, Mathematical                            | 17.68 | -7.16    |
| INT J MOD PHYS C      | 3.43  | 1.12     | Sornette D                   | 2.18  | 7.66     | Physics, Fluids & Plasmas                        | 5.92  | -7.16    |
| EUR PHYS J B          | 2.80  | 0.26     | Ausloos M                    | 1.87  | 7.02     | Physics, Condensed Matter                        | 4.75  | -1.58    |
| EUR PHYS J-SPEC TOP   | 2.18  | 3.09     | Amaral LAN                   | 1.79  | 7.44     | Physics, Applied                                 | 3.97  | -11.72   |
| CHAOS SOLITON FRACT   | 2.02  | -0.07    | Plerou V                     | 1.64  | 9.52     | Computer Science, Interdisciplinary Applications | 3.74  | -0.78    |
| ENTROPY-SWITZ         | 1.56  | 0.30     | Gopikrishnan P               | 1.56  | 9.29     | Mathematics, Interdisciplinary Applications      | 3.50  | -1.26    |
| J KOREAN PHYS SOC     | 1.48  | 5.59     | Kaizoji T                    | 1.25  | 7.65     | Mathematics, Applied                             | 2.65  | -4.91    |
| AIP CONF PROC         | 1.17  | -7.57    | Chakraborti A                | 1.17  | 6.78     | Mechanics                                        | 1.95  | -3.44    |
| NEW J PHYS            | 1.17  | -1.32    | Jiang ZQ                     | 1.17  | 6.27     | Multidisciplinary Sciences                       | 0.93  | -4.97    |

**Cluster 1 (“FLUCTUATIONS”).** Most cited publications (according to Web Of Science) and most representative publications (in term of in-degree  $d_{in}$  measuring the number of publications in the cluster that are linked with it) among all publications in the cluster.

|          |                    |                                                                                          |                                                                                                                      | <b>Most Cited publications</b>          |
|----------|--------------------|------------------------------------------------------------------------------------------|----------------------------------------------------------------------------------------------------------------------|-----------------------------------------|
| $d_{in}$ | <b>Times Cited</b> | <b>Publication Ref</b>                                                                   | <b>Publication Title</b>                                                                                             |                                         |
| 52       | 357                | Scalas E, 2000, PHYSICA A(284)                                                           | Fractional calculus and continuous-time finance                                                                      |                                         |
| 14       | 334                | Hlavackova-Schindler K, 2007, PHYS REP(441)                                              | Causality detection based on information-theoretic approaches in time series analysis                                |                                         |
| 8        | 290                | Mainardi F, 2000, PHYSICA A(287)                                                         | Fractional calculus and continuous-time finance II: the waiting-time distribution                                    |                                         |
| 61       | 273                | Dragulescu A, 2001, PHYSICA A(299)                                                       | Exponential and power-law probability distributions of wealth and income in the United Kingdom and the United States |                                         |
| 4        | 263                | Savit R, 1999, PHYS REV LETT(82)                                                         | Adaptive competition, market efficiency, and phase transitions                                                       |                                         |
| 8        | 255                | Kaniadakis G, 2002, PHYS REV E(66)                                                       | Statistical mechanics in the context of special relativity                                                           |                                         |
| 181      | 230                | Yakovenko VM, 2009, REV MOD PHYS(81)                                                     | Colloquium: Statistical mechanics of money, wealth, and income                                                       |                                         |
| 12       | 218                | Raberto M, 2002, PHYSICA A(314)                                                          | Waiting-times and returns in high-frequency financial data: an empirical study                                       |                                         |
| 533      | 183                | Kwapien J, 2012, PHYS REP(515)                                                           | Physical approach to complex systems                                                                                 |                                         |
| 39       | 174                | Amaral LAN, 1998, PHYS REV LETT(80)                                                      | Power law scaling for a system of interacting units with complex internal structure                                  |                                         |
| 48       | 165                | Weron R, 2002, PHYSICA A(312)                                                            | Estimating long-range dependence: finite sample properties and confidence intervals                                  |                                         |
| 97       | 157                | Amaral LAN, 1997, J PHYS I(7)                                                            | Scaling behavior in economics .1. Empirical results for company growth                                               |                                         |
| 71       | 151                | Chatterjee A, 2004, PHYSICA A(335)                                                       | Pareto law in a kinetic model of market with random saving propensity                                                |                                         |
| 86       | 145                | Plerou V, 2000, PHYS REV E(62)                                                           | Economic fluctuations and anomalous diffusion                                                                        |                                         |
|          |                    |                                                                                          |                                                                                                                      | <b>Most Representative Publications</b> |
| $d_{in}$ | <b>Times Cited</b> | <b>Publication Ref</b>                                                                   | <b>Publication Title</b>                                                                                             |                                         |
| 533      | 183                | Kwapien J, 2012, PHYS REP(515)                                                           | Physical approach to complex systems                                                                                 |                                         |
| 406      | 15                 | Stanley HE, 2007, PHYSICA A(382)                                                         | Economic fluctuations and statistical physics: Quantifying extremely rare and less rare events in finance            |                                         |
| 399      | 55                 | Stanley HE, 2008, PHYSICA A(387)                                                         | A statistical physics view of financial fluctuations: Evidence for scaling and universality                          |                                         |
| 392      | 83                 | Plerou V, 2000, PHYSICA A(279)                                                           | Econophysics: financial time series from a statistical physics point of view                                         |                                         |
| 377      | 77                 | Sornette D, 2014, REP PROG PHYS(77)                                                      | Physics and financial economics (1776-2014): puzzles, Ising and agent-based models                                   |                                         |
| 348      | 99                 | Gopikrishnan P, 2000, PHYSICA A(287)                                                     | Scaling and correlation in financial time series                                                                     |                                         |
| 348      | 0                  | Stanley HE, 2000, TRAFFIC AND GRANULAR FLOW'99: SOCIAL, TRAFFIC, AND GRANULAR DYNAMICS() | Econophysics: What can physicists contribute to economics?                                                           |                                         |
| 339      | 1                  | Gopikrishnan P, 2000, AIP CONF PROC(519)                                                 | Financial time series: A physics perspective                                                                         |                                         |
| 319      | 20                 | Stanley HE, 2000, PHYSICA A(287)                                                         | Quantifying fluctuations in economic systems by adapting methods of statistical physics                              |                                         |
| 300      | 24                 | Preis T, 2011, EUR PHYS J-SPEC TOP(194)                                                  | Econophysics - complex correlations and trend switchings in financial time series                                    |                                         |
| 298      | 4                  | Liang Y, 2013, FRONT PHYS-BEIJING(8)                                                     | Progress in physical properties of Chinese stock markets                                                             |                                         |
| 290      | 9                  | Qiu T, 2011, PHYSICA A(390)                                                              | Memory effect and multifractality of cross-correlations in financial markets                                         |                                         |
| 281      | 18                 | Gu GF, 2007, PHYSICA A(383)                                                              | Statistical properties of daily ensemble variables in the Chinese stock markets                                      |                                         |
| 261      | 99                 | Stanley HE, 1999, PHYSICA A(269)                                                         | Econophysics: Can physicists contribute to the science of economics?                                                 |                                         |



**Cluster 1 (“FLUCTUATIONS”).** Most cited and representative authors. For each author, we display the number  $N_a$  of publications their authored in that cluster, the sum  $TC_a$  of their number of citations (according to Web Of Science), and the sum  $k_a$  of their in-degree.

| Most Cited Authors |       |        |       |
|--------------------|-------|--------|-------|
| Author             | $N_a$ | $TC_a$ | $k_a$ |
| Stanley HE         | 52    | 1993   | 7214  |
| Zhou WX            | 52    | 1382   | 3290  |
| Amaral LAN         | 23    | 1241   | 4291  |
| Scalas E           | 14    | 1149   | 363   |
| Sornette D         | 28    | 938    | 1353  |
| Mainardi F         | 3     | 865    | 72    |
| Buldyrev SV        | 14    | 721    | 852   |
| Gopikrishnan P     | 20    | 716    | 4389  |
| Havlin S           | 12    | 699    | 1117  |
| Plerou V           | 21    | 691    | 4412  |
| Gorenflo R         | 2     | 647    | 60    |
| Yakovenko VM       | 6     | 642    | 479   |
| Raberto M          | 4     | 632    | 131   |
| Salinger MA        | 8     | 598    | 918   |
| Mantegna RN        | 14    | 511    | 802   |
| Stauffer D         | 12    | 468    | 481   |
| Jiang ZQ           | 15    | 444    | 880   |
| Weron R            | 9     | 443    | 350   |
| Gabaix X           | 8     | 420    | 1802  |

| Most Representative Authors |       |        |       |
|-----------------------------|-------|--------|-------|
| Author                      | $N_a$ | $TC_a$ | $k_a$ |
| Stanley HE                  | 52    | 1993   | 7214  |
| Plerou V                    | 21    | 691    | 4412  |
| Gopikrishnan P              | 20    | 716    | 4389  |
| Amaral LAN                  | 23    | 1241   | 4291  |
| Zhou WX                     | 52    | 1382   | 3290  |
| Gabaix X                    | 8     | 420    | 1802  |
| Qiu T                       | 14    | 125    | 1719  |
| Rosenow B                   | 7     | 175    | 1489  |
| Gu GF                       | 14    | 279    | 1488  |
| Sornette D                  | 28    | 938    | 1353  |
| Zhong LX                    | 11    | 72     | 1312  |
| Huang JP                    | 13    | 81     | 1295  |
| Chen W                      | 13    | 263    | 1269  |
| Chen G                      | 7     | 87     | 1168  |
| Zheng B                     | 10    | 62     | 1135  |
| Havlin S                    | 12    | 699    | 1117  |
| Ren F                       | 14    | 150    | 1105  |
| Chakraborti A               | 15    | 253    | 1035  |
| Salinger MA                 | 8     | 598    | 918   |

Cluster 4 (“CONSENSUS”). This cluster contains  $N = 1191$  publications.

| <b>Keywords</b>       | f(%)  | $\sigma$ | <b>Institution</b>     | f(%)  | $\sigma$ | <b>Reference</b>                                                | f(%)  | $\sigma$ |
|-----------------------|-------|----------|------------------------|-------|----------|-----------------------------------------------------------------|-------|----------|
| DYNAMICS              | 35.77 | 9.23     | DEPT PHYS              | 13.18 | -1.20    | Castellano C, 2009, REV MOD PHYS, 81, 591                       | 69.52 | 44.52    |
| MODEL                 | 19.65 | 6.88     | DEPT MATH              | 5.63  | 2.35     | Sznajd-Weron K, 2000, INT J MOD PHYS C, 11, 1157                | 28.21 | 37.64    |
| NETWORKS              | 15.62 | 8.41     | CNRS                   | 5.12  | 7.92     | Axelrod R, 1997, J CONFLICT RESOLUT, 41, 203                    | 17.38 | 29.12    |
| EVOLUTION             | 10.33 | 5.33     | DEPT FIS               | 4.87  | 4.88     | Deffuant G, 2001, ADV COMPLEX SYST, 3, 87                       | 12.51 | 26.01    |
| SYSTEMS               | 7.72  | 1.62     | INST FIS               | 4.45  | 7.91     | Deffuant G, 2000, APPLICATIONS OF SIMULATION TO SOCIAL SCIENCES | 12.43 | 25.03    |
| COMPLEX NETWORKS      | 7.56  | -7.45    | UNIV SAO PAULO         | 3.27  | 7.69     | Galam S, 2002, EUR PHYS J B, 25, 403                            | 12.26 | 25.27    |
| CONSENSUS             | 6.97  | 15.86    | DEPT COMP SCI          | 3.02  | 2.17     | Clifford P, 1973, BIOMETRIKA, 60, 581                           | 11.67 | 24.94    |
| OPINION DYNAMICS      | 6.47  | 14.54    | FAC PHYS               | 3.02  | 6.02     | Watts DJ, 1998, NATURE, 393, 440                                | 11.00 | -1.24    |
| BEHAVIOR              | 6.13  | -1.74    | INST THEORET PHYS      | 2.77  | 0.92     | Holley RA, 1975, ANN PROBAB, 3, 643                             | 10.83 | 23.26    |
| MODELS                | 6.05  | 3.54     | UNIV ROMA LA SAPIENZA  | 2.35  | 4.91     | Sood V, 2005, PHYS REV LETT, 94, 0                              | 10.24 | 20.90    |
| SZNAJD MODEL          | 5.12  | 13.98    | INST PHYS              | 2.27  | 0.69     | Krapivsky PL, 2003, PHYS REV LETT, 90, 0                        | 10.08 | 21.41    |
| PHYSICS               | 4.87  | 5.81     | IFISC                  | 2.18  | 8.14     | Galam S, 2008, INT J MOD PHYS C, 19, 409                        | 9.57  | 21.67    |
| SOCIAL NETWORKS       | 4.11  | -4.87    | WARSAW UNIV TECHNOL    | 2.18  | 6.01     | Barabasi AL, 1999, SCIENCE, 286, 509                            | 9.32  | -3.93    |
| STATISTICAL PHYSICS   | 4.11  | 8.00     | CNR                    | 1.93  | 3.09     | Lorenz J, 2007, INT J MOD PHYS C, 18, 1819                      | 9.32  | 22.62    |
| SMALL-WORLD NETWORKS  | 4.03  | 0.47     | CSIC                   | 1.93  | 5.39     | Castellano C, 2000, PHYS REV LETT, 85, 3536                     | 8.48  | 20.20    |
| IMPACT                | 3.86  | 5.93     | CONICET                | 1.76  | 6.55     | Galam S, 2004, PHYSICA A, 333, 453                              | 8.31  | 20.23    |
| EMERGENCE             | 3.78  | -1.72    | DIPARTIMENTO FIS       | 1.68  | 2.12     | Klemm K, 2003, PHYS REV E, 67, 0                                | 7.81  | 19.00    |
| STATISTICAL-MECHANICS | 3.53  | 1.07     | SCH PHYS & ASTRON      | 1.68  | 4.84     | Albert R, 2002, REV MOD PHYS, 74, 47                            | 7.72  | -3.18    |
| SOCIOPHYSICS          | 3.27  | 10.88    | AGH UNIV SCI & TECHNOL | 1.60  | 4.80     | Galam S, 2012, UNDERST COMPLEX SYST                             | 7.22  | 18.38    |
| DISSEMINATION         | 3.19  | 10.16    | BEIJING JIAOTONG UNIV  | 1.60  | 2.49     | Galam S, 2007, PHYSICA A, 381, 366                              | 7.14  | 18.95    |
| <b>Title Words</b>    | f(%)  | $\sigma$ | <b>Country</b>         | f(%)  | $\sigma$ | <b>RefJournal</b>                                               | f(%)  | $\sigma$ |
| MODEL                 | 31.32 | 18.36    | USA                    | 19.06 | -1.07    | PHYS REV E                                                      | 75.90 | 11.65    |
| OPINION               | 25.61 | 35.91    | Peoples R China        | 15.45 | -7.94    | REV MOD PHYS                                                    | 74.81 | 31.49    |
| DYNAMICS              | 22.67 | 16.18    | Italy                  | 11.08 | 4.30     | PHYSICA A                                                       | 66.33 | 9.66     |
| SOCIAL                | 18.22 | 3.27     | Brazil                 | 9.49  | 7.45     | PHYS REV LETT                                                   | 59.87 | 8.17     |
| NETWORKS              | 15.70 | -2.27    | UK                     | 9.49  | 2.87     | INT J MOD PHYS C                                                | 53.06 | 35.39    |
| FORMATION             | 9.32  | 17.68    | France                 | 9.40  | 8.74     | EUR PHYS J B                                                    | 48.95 | 12.56    |
| CONSENSUS             | 6.97  | 18.51    | Poland                 | 8.82  | 8.15     | NATURE                                                          | 36.78 | -6.11    |
| MODELS                | 6.38  | 6.29     | Germany                | 7.72  | 1.06     | P NATL ACAD SCI USA                                             | 34.17 | -2.04    |
| PHASE                 | 5.63  | 11.33    | Spain                  | 7.64  | 3.57     | J STAT MECH-THEORY E                                            | 30.98 | 15.37    |
| INFLUENCE             | 4.45  | 6.23     | Argentina              | 3.86  | 6.05     | SCIENCE                                                         | 30.56 | -3.70    |
| <b>Journal</b>        | f(%)  | $\sigma$ | <b>Author</b>          | f(%)  | $\sigma$ | <b>Subject</b>                                                  | f(%)  | $\sigma$ |
| PHYS REV E            | 17.55 | 6.87     | Galam S                | 2.94  | 12.03    | Physics, Mathematical                                           | 37.28 | 8.43     |
| PHYSICA A             | 17.30 | -6.11    | Crokidakis N           | 1.76  | 8.88     | Physics, Multidisciplinary                                      | 34.34 | -11.02   |
| INT J MOD PHYS C      | 6.05  | 6.46     | Sznajd-Weron K         | 1.76  | 9.71     | Physics, Fluids & Plasmas                                       | 17.97 | 5.66     |
| J STAT MECH-THEORY E  | 4.70  | 5.38     | San Miguel M           | 1.68  | 8.13     | Multidisciplinary Sciences                                      | 11.00 | 14.18    |
| EPL-EUROPHYS LETT     | 3.44  | 2.54     | Holyst JA              | 1.43  | 6.61     | Computer Science, Interdisciplinary Applications                | 7.89  | 6.42     |
| EUR PHYS J B          | 3.27  | 1.25     | Kulakowski K           | 1.43  | 5.25     | Mathematics, Interdisciplinary Applications                     | 5.79  | 2.72     |
| PLOS ONE              | 3.19  | 6.43     | Baronchelli A          | 1.34  | 7.76     | Mechanics                                                       | 5.29  | 2.74     |
| J STAT PHYS           | 2.77  | 5.66     | Liu Y                  | 1.34  | 3.35     | Mathematics, Applied                                            | 4.87  | -1.47    |
| ADV COMPLEX SYST      | 2.43  | 10.56    | Castellano C           | 1.26  | 6.90     | Physics, Condensed Matter                                       | 4.70  | -1.60    |
| SCI REP-UK            | 2.10  | 4.54     | Eguiluz VM             | 1.18  | 6.09     | Automation & Control Systems                                    | 3.27  | 11.15    |

**Cluster 4 (“CONSENSUS”).** Most cited publications (according to Web Of Science) and most representative publications (in term of in-degree  $d_{in}$  measuring the number of publications in the cluster that are linked with it) among all publications in the cluster.

| <b>Most Cited publications</b>          |             |                                             |                                                                                                                           |
|-----------------------------------------|-------------|---------------------------------------------|---------------------------------------------------------------------------------------------------------------------------|
| $d_{in}$                                | Times Cited | Publication Ref                             | Publication Title                                                                                                         |
| 900                                     | 1596        | Castellano C, 2009, REV MOD PHYS(81)        | Statistical physics of social dynamics                                                                                    |
| 4                                       | 748         | Sznajd-Weron K, 2000, INT J MOD PHYS C(11)  | Opinion evolution in closed community                                                                                     |
| 168                                     | 259         | Holme P, 2006, PHYS REV E(74)               | Nonequilibrium phase transition in the coevolution of networks and opinions                                               |
| 3                                       | 244         | Galam S, 2002, EUR PHYS J B(25)             | Minority opinion spreading in random geometry                                                                             |
| 223                                     | 240         | Lorenz J, 2007, INT J MOD PHYS C(18)        | Continuous opinion dynamics under bounded confidence: A survey                                                            |
| 8                                       | 196         | Castellano C, 2000, PHYS REV LETT(85)       | Nonequilibrium phase transition in a model for social influence                                                           |
| 141                                     | 182         | Galam S, 2008, INT J MOD PHYS C(19)         | Sociophysics: A review of Galam models                                                                                    |
| 9                                       | 168         | Baronchelli A, 2006, J STAT MECH-THEORY E() | Sharp transition towards shared vocabularies in multi-agent systems                                                       |
| 19                                      | 140         | Galam S, 1997, PHYSICA A(238)               | Rational group decision making: A random field Ising model at T=0                                                         |
| 242                                     | 136         | Kozma B, 2008, PHYS REV E(77)               | Consensus formation on adaptive networks                                                                                  |
| 261                                     | 126         | Slanina F, 2003, EUR PHYS J B(35)           | Analytical results for the Sznajd model of opinion formation                                                              |
| 207                                     | 121         | Xie J, 2011, PHYS REV E(84)                 | Social consensus through the influence of committed minorities                                                            |
| 294                                     | 114         | Acemoglu D, 2013, MATH OPER RES(38)         | Opinion Fluctuations and Disagreement in Social Networks                                                                  |
| 203                                     | 104         | Galam S, 2005, EUROPHYS LETT(70)            | Local dynamics vs. social mechanisms: A unifying frame                                                                    |
| <b>Most Representative Publications</b> |             |                                             |                                                                                                                           |
| $d_{in}$                                | Times Cited | Publication Ref                             | Publication Title                                                                                                         |
| 900                                     | 1596        | Castellano C, 2009, REV MOD PHYS(81)        | Statistical physics of social dynamics                                                                                    |
| 632                                     | 3           | Baronchelli A, 2018, ROY SOC OPEN SCI(5)    | The emergence of consensus: a primer                                                                                      |
| 597                                     | 6           | Dong YC, 2018, INFORM FUSION(43)            | A survey on the fusion process in opinion dynamics                                                                        |
| 561                                     | 10          | Mobilia M, 2013, J STAT PHYS(151)           | Commitment Versus Persuasion in the Three-Party Constrained Voter Model                                                   |
| 513                                     | 56          | Nyczka P, 2013, J STAT PHYS(151)            | Anticonformity or Independence?-Insights from Statistical Physics                                                         |
| 513                                     | 0           | Proskurnikov AV, 2018, ANNU REV CONTROL(45) | A tutorial on modeling and analysis of dynamic social networks. Part II                                                   |
| 498                                     | 2           | Meng XF, 2018, PHYS REV E(97)               | Opinion formation and distribution in a bounded-confidence model on various networks                                      |
| 489                                     | 8           | Slanina F, 2011, EUR PHYS J B(79)           | Dynamical phase transitions in Hegselmann-Krause model of opinion dynamics and consensus                                  |
| 476                                     | 4           | Balankin AS, 2011, PHYSICA A(390)           | Effect of initial concentration and spatial heterogeneity of active agent distribution on opinion dynamics                |
| 469                                     | 14          | Mobilia M, 2011, EPL-EUROPHYS LETT(95)      | Fixation and polarization in a three-species opinion dynamics model                                                       |
| 466                                     | 3           | Gambra MB, 2011, EUR PHYS J B(83)           | Social dynamics with peer support on heterogeneous networks The "mafia model"                                             |
| 445                                     | 41          | Yang HX, 2009, PHYS REV E(80)               | Effects of social diversity on the emergence of global consensus in opinion dynamics                                      |
| 435                                     | 0           | Vieira AR, 2018, PHYS REV E(97)             | Threshold q-voter model                                                                                                   |
| 433                                     | 34          | Sun ZL, 2013, ENVIRON MODELL SOFTW(45)      | A framework for modeling payments for ecosystem services with agent-based models, Bayesian belief networks and opinion... |

**Cluster 4 (“CONSENSUS”).** Most cited and representative authors. For each author, we display the number  $N_a$  of publications their authored in that cluster, the sum  $TC_a$  of their number of citations (according to Web Of Science), and the sum  $k_a$  of their in-degree.

| Most Cited Authors |       |        |       |
|--------------------|-------|--------|-------|
| Author             | $N_a$ | $TC_a$ | $k_a$ |
| Castellano C       | 15    | 2151   | 2882  |
| Loreto V           | 12    | 2020   | 2013  |
| Fortunato S        | 8     | 1837   | 1702  |
| Galam S            | 35    | 1338   | 3981  |
| Sznajd-Weron K     | 21    | 1050   | 3095  |
| Sznajd J           | 2     | 748    | 43    |
| San Miguel M       | 20    | 518    | 2804  |
| Baronchelli A      | 16    | 507    | 2364  |
| Holyst JA          | 17    | 478    | 1268  |
| Eguiluz VM         | 14    | 354    | 1996  |
| Steels L           | 3     | 312    | 155   |
| Redner S           | 8     | 287    | 435   |
| Deffuant G         | 5     | 278    | 307   |
| Holme P            | 5     | 269    | 805   |
| Lorenz J           | 3     | 261    | 541   |
| Newman MEJ         | 1     | 259    | 168   |
| Gonzalez-Avella JC | 10    | 253    | 1548  |
| Martins ACR        | 13    | 249    | 2536  |
| Marsili M          | 4     | 241    | 327   |

| Most Representative Authors |       |        |       |
|-----------------------------|-------|--------|-------|
| Author                      | $N_a$ | $TC_a$ | $k_a$ |
| Liu Y                       | 16    | 152    | 4299  |
| Crokidakis N                | 21    | 224    | 4123  |
| Galam S                     | 35    | 1338   | 3981  |
| Sznajd-Weron K              | 21    | 1050   | 3095  |
| Xiong F                     | 12    | 90     | 3028  |
| Castellano C                | 15    | 2151   | 2882  |
| San Miguel M                | 20    | 518    | 2804  |
| Martins ACR                 | 13    | 249    | 2536  |
| Anteneodo C                 | 9     | 108    | 2395  |
| Baronchelli A               | 16    | 507    | 2364  |
| Toral R                     | 12    | 205    | 2129  |
| Loreto V                    | 12    | 2020   | 2013  |
| Wang BH                     | 9     | 84     | 2002  |
| Eguiluz VM                  | 14    | 354    | 1996  |
| Yang HX                     | 7     | 68     | 1962  |
| Stanley HE                  | 6     | 145    | 1818  |
| Mobilia M                   | 5     | 64     | 1802  |
| Pastor-Satorras R           | 9     | 179    | 1795  |
| Javarone MA                 | 11    | 64     | 1786  |

**Cluster 3 (“EVOLUTIONARY GAMES”).** This cluster contains  $N = 640$  publications.

| <b>Keywords</b>        | f(%)  | $\sigma$ | <b>Institution</b>         | f(%)  | $\sigma$ | <b>Reference</b>                                 | f(%)  | $\sigma$ |
|------------------------|-------|----------|----------------------------|-------|----------|--------------------------------------------------|-------|----------|
| DYNAMICS               | 36.25 | 7.05     | DEPT PHYS                  | 17.81 | 2.46     | Nowak MA, 1992, NATURE, 359, 826                 | 57.81 | 60.78    |
| COOPERATION            | 30.63 | 33.89    | PEKING UNIV                | 9.84  | 17.82    | Szabo G, 2007, PHYS REP, 446, 97                 | 57.34 | 57.75    |
| EVOLUTIONARY GAMES     | 28.44 | 37.28    | UNIV MARIBOR               | 9.69  | 22.43    | Santos FC, 2005, PHYS REV LETT, 95, 0            | 43.75 | 52.99    |
| EMERGENCE              | 26.88 | 25.93    | COLL ENGN                  | 9.38  | 21.11    | Nowak MA, 2006, SCIENCE, 314, 1560               | 40.16 | 50.68    |
| SOCIAL DILEMMAS        | 24.69 | 35.38    | FAC NAT SCI & MATH         | 9.38  | 22.36    | Perc M, 2010, BIOSYSTEMS, 99, 109                | 38.12 | 46.66    |
| PRISONERS-DILEMMA GAME | 17.34 | 29.51    | CTR SYST & CONTROL         | 8.75  | 23.15    | Szabo G, 1998, PHYS REV E, 58, 69                | 36.41 | 47.93    |
| NETWORKS               | 16.41 | 6.87     | STATE KEY LAB TURBULENCE & | 6.56  | 19.83    | Axelrod Robert, 1984, EVOLUTION COOPERATIO       | 32.66 | 43.90    |
| COMPLEX NETWORKS       | 16.09 | 0.54     | COMPLEX SYST               |       |          | Hofbauer J, 1998, EVOLUTIONARY GAMES P           | 32.34 | 44.22    |
| GRAPHS                 | 15.78 | 19.72    | HUNGARIAN ACAD SCI         | 6.25  | 16.25    | Nowak MA, 2006, EVOLUTIONARY DYNAMIC             | 32.34 | 43.77    |
| EVOLUTION              | 14.37 | 8.06     | INST TECH PHYS & MAT SCI   | 6.09  | 19.60    | Santos FC, 2006, P NATL ACAD SCI USA, 103, 3490  | 28.59 | 43.01    |
| SOCIAL NETWORKS        | 12.97 | 4.72     | DEPT MATH                  | 5.31  | 1.33     | Santos FC, 2008, NATURE, 454, 213                | 28.59 | 42.74    |
| PRISONERS-DILEMMA      | 12.81 | 24.98    | UNIV ZARAGOZA              | 5.00  | 9.43     | Smith JMaynard, 1982, EVOLUTION THEORY GAM       | 27.66 | 41.47    |
| SNOWDRIFT GAME         | 12.50 | 24.83    | MINIST EDUC                | 4.53  | 6.96     | Hauert C, 2004, NATURE, 428, 643                 | 27.19 | 41.61    |
| PUBLIC-GOODS GAMES     | 11.88 | 24.55    | UNIV SCI & TECHNOL CHINA   | 4.22  | 5.83     | Axelrod R, 1981, SCIENCE, 211, 1390              | 23.59 | 37.60    |
| BEHAVIOR               | 11.41 | 3.81     | XIDIAN UNIV                | 4.22  | 9.66     | Ohtsuki H, 2006, NATURE, 441, 502                | 23.59 | 37.07    |
| POPULATIONS            | 10.62 | 19.21    | TIANJIN UNIV TECHNOL       | 3.91  | 13.46    | Barabasi AL, 1999, SCIENCE, 286, 509             | 23.28 | 7.56     |
| SCALE-FREE NETWORKS    | 10.00 | 10.55    | INTERDISCIPLINARY GRAD SCH | 3.59  | 12.25    | Perc M, 2008, PHYS REV E, 77, 0                  | 22.81 | 38.02    |
| GAMES                  | 9.06  | 17.34    | ENGN SCI                   |       |          | Gomez-Gardenes J, 2007, PHYS REV LETT, 98, 0     | 21.56 | 35.33    |
| SELECTION              | 8.59  | 16.56    | RES CTR NAT SCI            | 3.59  | 14.89    | Perc M, 2013, J R SOC INTERFACE, 10, 0           | 21.56 | 35.47    |
| INDIRECT RECIPROCITY   | 8.28  | 20.62    | KYUSHU UNIV                | 3.44  | 10.09    | Roca CP, 2009, PHYS LIFE REV, 6, 208             | 18.59 | 34.24    |
| <b>Title Words</b>     | f(%)  | $\sigma$ | HARVARD UNIV               | 3.28  | 6.73     | <b>RefJournal</b>                                | f(%)  | $\sigma$ |
| COOPERATION            | 41.25 | 52.98    | DEPT FIS                   | 3.12  | 0.81     | PHYS REV E                                       | 91.88 | 16.77    |
| GAME                   | 25.47 | 30.18    | <b>Country</b>             | f(%)  | $\sigma$ | NATURE                                           | 89.22 | 22.16    |
| DILEMMA                | 19.84 | 34.92    | Peoples R China            | 55.16 | 17.24    | SCIENCE                                          | 82.34 | 24.63    |
| GAMES                  | 19.84 | 30.38    | USA                        | 13.28 | -4.42    | PHYS REV LETT                                    | 78.75 | 15.55    |
| SPATIAL                | 19.53 | 29.74    | Slovenia                   | 9.69  | 19.36    | P NATL ACAD SCI USA                              | 77.97 | 21.45    |
| EVOLUTIONARY           | 19.22 | 29.52    | Hungary                    | 9.38  | 12.16    | J THEOR BIOL                                     | 73.28 | 45.42    |
| SOCIAL                 | 17.97 | 2.22     | Spain                      | 7.19  | 2.11     | PHYS REP                                         | 65.62 | 27.76    |
| NETWORKS               | 17.50 | -0.48    | Japan                      | 6.72  | 2.59     | PHYSICA A                                        | 63.28 | 5.54     |
| PRISONERS              | 17.50 | 34.21    | Germany                    | 4.84  | -2.09    | NEW J PHYS                                       | 59.06 | 29.86    |
| EVOLUTION              | 13.44 | 15.51    | Switzerland                | 4.06  | 1.90     | EPL-EUROPHYS LETT                                | 58.44 | 25.11    |
| <b>Journal</b>         | f(%)  | $\sigma$ | Italy                      | 3.75  | -3.78    | <b>Subject</b>                                   | f(%)  | $\sigma$ |
| PHYS REV E             | 21.56 | 8.25     | UK                         | 3.44  | -3.77    | Physics, Multidisciplinary                       | 56.25 | 3.01     |
| PHYSICA A              | 19.53 | -3.17    | <b>Author</b>              | f(%)  | $\sigma$ | Physics, Mathematical                            | 44.06 | 10.07    |
| CHAOS SOLITON FRACT    | 9.84  | 13.90    | Wang L                     | 12.50 | 24.66    | Physics, Fluids & Plasmas                        | 23.28 | 8.21     |
| EPL-EUROPHYS LETT      | 7.66  | 8.92     | Perc M                     | 9.69  | 23.74    | Mathematics, Interdisciplinary Applications      | 12.03 | 9.86     |
| NEW J PHYS             | 6.09  | 8.89     | Szolnoki A                 | 7.81  | 22.89    | Mechanics                                        | 6.25  | 3.28     |
| J STAT MECH-THEORY E   | 4.22  | 3.13     | Wang Z                     | 5.94  | 15.41    | Physics, Condensed Matter                        | 5.00  | -0.85    |
| EUR PHYS J B           | 4.06  | 2.15     | Chen XJ                    | 3.91  | 16.16    | Mathematics, Applied                             | 4.84  | -1.10    |
| INT J MOD PHYS C       | 1.88  | -1.55    | Fu F                       | 3.44  | 14.76    | Multidisciplinary Sciences                       | 2.81  | -0.91    |
| PHYS LETT A            | 1.88  | 2.17     | Tanimoto J                 | 3.28  | 12.45    | Computer Science, Interdisciplinary Applications | 2.19  | -2.51    |
| PHYS REV LETT          | 1.88  | 1.34     | Wu T                       | 3.28  | 14.03    | Physics, Applied                                 | 2.03  | -9.62    |
|                        |       |          | Wang BH                    | 2.81  | 6.53     |                                                  |       |          |
|                        |       |          | Wang J                     | 2.81  | 8.52     |                                                  |       |          |

**Cluster 3 (“EVOLUTIONARY GAMES”).** Most cited publications (according to Web Of Science) and most representative publications (in term of in-degree  $d_{in}$  measuring the number of publications in the cluster that are linked with it) among all publications in the cluster.

| <b>Most Cited publications</b>          |             |                                            |                                                                                                                        |
|-----------------------------------------|-------------|--------------------------------------------|------------------------------------------------------------------------------------------------------------------------|
| $d_{in}$                                | Times Cited | Publication Ref                            | Publication Title                                                                                                      |
| 573                                     | 1463        | Szabo G, 2007, PHYS REP(446)               | Evolutionary games on graphs                                                                                           |
| 586                                     | 936         | Perc M, 2010, BIOSYSTEMS(99)               | Coevolutionary games-A mini review                                                                                     |
| 529                                     | 515         | Perc M, 2013, J R SOC INTERFACE(10)        | Evolutionary dynamics of group interactions on structured populations: a review                                        |
| 487                                     | 389         | Perc M, 2008, PHYS REV E(77)               | Social diversity and promotion of cooperation in the spatial prisoner’s dilemma game                                   |
| 87                                      | 339         | Abramson G, 2001, PHYS REV E(63)           | Social games in a social network                                                                                       |
| 327                                     | 332         | Gomez-Gardenes J, 2007, PHYS REV LETT(98)  | Dynamical organization of cooperation in complex topologies                                                            |
| 528                                     | 261         | Wang Z, 2015, EUR PHYS J B(88)             | Evolutionary games on multilayer networks: a colloquium                                                                |
| 377                                     | 249         | Traulsen A, 2006, PHYS REV E(74)           | Stochastic dynamics of invasion and fixation                                                                           |
| 440                                     | 213         | Wang Z, 2012, EPL-EUROPHYS LETT(97)        | Evolution of public cooperation on interdependent networks: The impact of biased utility functions                     |
| 492                                     | 209         | Wang Z, 2013, SCI REP-UK(3)                | Interdependent network reciprocity in evolutionary games                                                               |
| 162                                     | 205         | Zimmermann MG, 2005, PHYS REV E(72)        | Cooperation, social networks, and the emergence of leadership in a prisoner’s dilemma with adaptive local interactions |
| 456                                     | 170         | Szolnoki A, 2008, PHYSICA A(387)           | Towards effective payoffs in the prisoner’s dilemma game on scale-free networks                                        |
| 450                                     | 162         | Szolnoki A, 2009, EPL-EUROPHYS LETT(86)    | Resolving social dilemmas on evolving random networks                                                                  |
| 584                                     | 161         | Perc M, 2017, PHYS REP(687)                | Statistical physics of human cooperation                                                                               |
| <b>Most Representative Publications</b> |             |                                            |                                                                                                                        |
| $d_{in}$                                | Times Cited | Publication Ref                            | Publication Title                                                                                                      |
| 586                                     | 936         | Perc M, 2010, BIOSYSTEMS(99)               | Coevolutionary games-A mini review                                                                                     |
| 584                                     | 161         | Perc M, 2017, PHYS REP(687)                | Statistical physics of human cooperation                                                                               |
| 573                                     | 1463        | Szabo G, 2007, PHYS REP(446)               | Evolutionary games on graphs                                                                                           |
| 567                                     | 3           | Du FQ, 2013, CHAOS SOLITON FRACT(56)       | Quantifying the impact of noise on macroscopic organization of cooperation in spatial games                            |
| 558                                     | 6           | Zschaler G, 2012, EUR PHYS J-SPEC TOP(211) | Adaptive-network models of collective dynamics                                                                         |
| 543                                     | 95          | Perc M, 2013, CHAOS SOLITON FRACT(56)      | Collective behavior and evolutionary games - An introduction                                                           |
| 536                                     | 34          | Fu F, 2013, J STAT PHYS(151)               | Global Migration Can Lead to Stronger Spatial Selection than Local Migration                                           |
| 535                                     | 1           | Wang L, 2018, PHYSICA A(490)               | The role of emotions in spatial prisoner’s dilemma game with voluntary participation                                   |
| 529                                     | 515         | Perc M, 2013, J R SOC INTERFACE(10)        | Evolutionary dynamics of group interactions on structured populations: a review                                        |
| 528                                     | 261         | Wang Z, 2015, EUR PHYS J B(88)             | Evolutionary games on multilayer networks: a colloquium                                                                |
| 527                                     | 17          | Wu ZX, 2014, PHYS REV E(89)                | Social dilemma alleviated by sharing the gains with immediate neighbors                                                |
| 526                                     | 119         | Fu F, 2009, PHYS REV E(79)                 | Partner switching stabilizes cooperation in coevolutionary prisoner’s dilemma                                          |
| 526                                     | 1           | Jin JH, 2018, CHAOS SOLITON FRACT(106)     | Heterogeneous fitness promotes cooperation in the spatial prisoner’s dilemma game                                      |
| 520                                     | 5           | Su Q, 2017, NEW J PHYS(19)                 | Evolutionary dynamics under interactive diversity                                                                      |

**Cluster 3 (“EVOLUTIONARY GAMES”).** Most cited and representative authors. For each author, we display the number  $N_a$  of publications their authored in that cluster, the sum  $TC_a$  of their number of citations (according to Web Of Science), and the sum  $k_a$  of their in-degree.

| <b>Most Cited Authors</b> |       |        |       |
|---------------------------|-------|--------|-------|
| <b>Author</b>             | $N_a$ | $TC_a$ | $k_a$ |
| Perc M                    | 62    | 5574   | 27272 |
| Szolnoki A                | 50    | 4820   | 21755 |
| Wang L                    | 81    | 2127   | 33317 |
| Szabo G                   | 14    | 2094   | 5003  |
| Wang Z                    | 40    | 1813   | 16854 |
| Gomez-Gardenes J          | 17    | 1658   | 6490  |
| Moreno Y                  | 14    | 1497   | 5701  |
| Fath G                    | 1     | 1463   | 573   |
| Floria LM                 | 7     | 1110   | 2746  |
| Fu F                      | 22    | 1012   | 9365  |
| Chen XJ                   | 25    | 572    | 9854  |
| Nowak MA                  | 7     | 539    | 2805  |
| Wu T                      | 21    | 510    | 9288  |
| Traulsen A                | 5     | 471    | 2039  |
| Pacheco JM                | 10    | 471    | 3191  |
| Wang WX                   | 9     | 453    | 2960  |
| Xia CY                    | 18    | 435    | 8165  |
| Wu ZX                     | 18    | 423    | 6960  |
| Wang J                    | 18    | 376    | 7699  |

| <b>Most Representative Authors</b> |       |        |       |
|------------------------------------|-------|--------|-------|
| <b>Author</b>                      | $N_a$ | $TC_a$ | $k_a$ |
| Wang L                             | 81    | 2127   | 33317 |
| Perc M                             | 62    | 5574   | 27272 |
| Szolnoki A                         | 50    | 4820   | 21755 |
| Wang Z                             | 40    | 1813   | 16854 |
| Chen XJ                            | 25    | 572    | 9854  |
| Fu F                               | 22    | 1012   | 9365  |
| Wu T                               | 21    | 510    | 9288  |
| Xia CY                             | 18    | 435    | 8165  |
| Wang J                             | 18    | 376    | 7699  |
| Wu ZX                              | 18    | 423    | 6960  |
| Wang BH                            | 18    | 292    | 6583  |
| Gomez-Gardenes J                   | 17    | 1658   | 6490  |
| Moreno Y                           | 14    | 1497   | 5701  |
| Tanimoto J                         | 21    | 350    | 5253  |
| Szabo G                            | 14    | 2094   | 5003  |
| Sanchez A                          | 14    | 306    | 4979  |
| Yang HX                            | 13    | 160    | 4947  |
| Li Z                               | 11    | 91     | 4524  |
| Rong ZH                            | 9     | 195    | 4130  |

Cluster 13 (“MODULARITY”). This cluster contains  $N = 299$  publications.

| Keywords               | f(%)  | $\sigma$ | Institution                                                 | f(%)  | $\sigma$ | Reference                                        | f(%)  | $\sigma$ |
|------------------------|-------|----------|-------------------------------------------------------------|-------|----------|--------------------------------------------------|-------|----------|
| COMPLEX NETWORKS       | 41.14 | 12.39    | DEPT PHYS                                                   | 11.04 | -1.66    | Newman MEJ, 2004, PHYS REV E, 69, 0              | 56.86 | 51.68    |
| SOCIAL NETWORKS        | 22.41 | 9.27     | DEPT COMP SCI                                               | 6.69  | 5.49     | Girvan M, 2002, P NATL ACAD SCI USA, 99, 7821    | 54.52 | 41.88    |
| COMMUNITY STRUCTURE    | 18.39 | 18.82    | MINIST EDUC                                                 | 6.02  | 6.99     | Fortunato S, 2010, PHYS REP, 486, 75             | 42.47 | 40.73    |
| MODULARITY             | 13.71 | 26.39    | XIDIAN UNIV                                                 | 5.35  | 8.79     | Zachary WW, 1977, J ANTHROPOL RES, 33, 452       | 33.44 | 39.38    |
| DYNAMICS               | 11.71 | -5.08    | COLL COMP SCI & TECHNOL                                     | 4.68  | 10.17    | Newman MEJ, 2006, P NATL ACAD SCI USA, 103, 8577 | 31.44 | 39.55    |
| ALGORITHM              | 9.03  | 13.44    | DEPT MATH                                                   | 4.68  | 0.37     | Blondel VD, 2008, J STAT MECH-THEORY E           | 29.43 | 40.14    |
| MODEL                  | 9.03  | -2.02    | SCH COMP SCI & TECHNOL                                      | 4.35  | 8.18     | Palla G, 2005, NATURE, 435, 814                  | 28.76 | 36.14    |
| ORGANIZATION           | 8.36  | 8.62     | UNIV OXFORD                                                 | 4.01  | 5.92     | Fortunato S, 2007, P NATL ACAD SCI USA, 104, 36  | 25.42 | 40.62    |
| NETWORKS               | 6.69  | -1.25    | KEY LAB INTELLIGENT PER-<br>CEPT & IMAGE UNDERSTAND-<br>ING | 3.68  | 11.96    | Newman MEJ, 2006, PHYS REV E, 74, 0              | 25.08 | 32.35    |
| EVOLUTION              | 6.35  | -0.11    | CENT UNIV FINANCE & ECON                                    | 2.68  | 11.04    | Lancichinetti A, 2008, PHYS REV E, 78, 0         | 21.74 | 34.48    |
| METABOLIC NETWORKS     | 6.35  | 11.28    | DEPT COMP SCI & ENGN                                        | 2.68  | 5.09     | Danon L, 2005, J STAT MECH-THEORY E              | 21.40 | 36.34    |
| WEB                    | 5.02  | 4.53     | OXFORD CTR IND & APPL MATH                                  | 2.68  | 10.12    | Watts DJ, 1998, NATURE, 393, 440                 | 20.07 | 4.17     |
| MODELS                 | 4.68  | 0.58     | SCH COMP SCI                                                | 2.68  | 5.18     | Clauset A, 2004, PHYS REV E, 70, 0               | 19.40 | 30.77    |
| CENTRALITY             | 4.01  | 3.32     | SCH MANAGEMENT SCI & ENGN                                   | 2.68  | 8.46     | Rosvall M, 2008, P NATL ACAD SCI USA, 105, 1118  | 19.40 | 30.98    |
| GRAPHS                 | 4.01  | 1.22     | AALTO UNIV                                                  | 2.34  | 2.61     | Guimera R, 2005, NATURE, 433, 895                | 17.73 | 30.49    |
| IDENTIFICATION         | 4.01  | 5.61     | CABDYN COMPLEX CTR                                          | 2.34  | 7.07     | Lusseau D, 2003, BEHAV ECOL SOCIOBIOL, 54, 396   | 16.39 | 27.43    |
| SYSTEMS                | 4.01  | -1.78    | ISI FDN                                                     | 2.34  | 5.68     | Radicchi F, 2004, P NATL ACAD SCI USA, 101, 2658 | 15.38 | 26.67    |
| PREDICTION             | 3.34  | 5.50     | SANTA FE INST                                               | 2.34  | 2.18     | Clauset A, 2008, NATURE, 453, 98                 | 15.05 | 22.85    |
| OPTIMIZATION           | 2.68  | 4.54     | SCH COMP SCI & ENGN                                         | 2.34  | 4.75     | Lancichinetti A, 2009, NEW J PHYS, 11, 0         | 15.05 | 31.10    |
| STOCHASTIC BLOCKMODELS | 2.68  | 10.94    | UNIV FRIBOURG                                               | 2.34  | 3.02     | Lancichinetti A, 2009, PHYS REV E, 80, 0         | 14.38 | 29.33    |
| Title Words            | f(%)  | $\sigma$ | Country                                                     | f(%)  | $\sigma$ | RefJournal                                       | f(%)  | $\sigma$ |
| NETWORKS               | 57.86 | 17.74    | Peoples R China                                             | 44.15 | 7.41     | PHYS REV E                                       | 90.30 | 10.91    |
| COMMUNITY              | 36.79 | 39.48    | USA                                                         | 23.41 | 1.33     | P NATL ACAD SCI USA                              | 86.62 | 17.76    |
| DETECTION              | 26.42 | 37.28    | UK                                                          | 12.37 | 3.36     | NATURE                                           | 74.92 | 10.18    |
| STRUCTURE              | 17.06 | 15.03    | Italy                                                       | 8.36  | 0.40     | J STAT MECH-THEORY E                             | 57.19 | 20.37    |
| COMMUNITIES            | 15.72 | 24.05    | Spain                                                       | 7.02  | 1.31     | PHYSICA A                                        | 55.52 | 1.10     |
| SOCIAL                 | 15.38 | 0.26     | Finland                                                     | 3.34  | 2.98     | PHYS REP                                         | 55.18 | 14.54    |
| COMPLEX                | 14.72 | 6.65     | Germany                                                     | 3.34  | -2.45    | PHYS REV LETT                                    | 50.17 | 0.74     |
| BASED                  | 12.04 | 5.96     | Switzerland                                                 | 3.34  | 0.55     | SCIENCE                                          | 47.49 | 4.26     |
| ALGORITHM              | 9.70  | 14.23    | Canada                                                      | 2.68  | 1.34     | EUR PHYS J B                                     | 39.80 | 2.90     |
| NETWORK                | 9.03  | 1.44     | France                                                      | 2.68  | -1.37    | J ANTHROPOL RES                                  | 34.11 | 39.50    |
| Journal                | f(%)  | $\sigma$ | Author                                                      | f(%)  | $\sigma$ | Subject                                          | f(%)  | $\sigma$ |
| PHYSICA A              | 28.09 | 1.25     | Porter MA                                                   | 3.01  | 10.42    | Physics, Multidisciplinary                       | 49.50 | -0.28    |
| PHYS REV E             | 18.06 | 3.72     | Jiao LC                                                     | 2.34  | 11.41    | Physics, Mathematical                            | 40.13 | 5.34     |
| J STAT MECH-THEORY E   | 5.35  | 3.44     | Mucha PJ                                                    | 2.34  | 10.20    | Physics, Fluids & Plasmas                        | 19.06 | 3.41     |
| EUR PHYS J B           | 5.02  | 2.49     | Li HJ                                                       | 2.01  | 8.65     | Physics, Condensed Matter                        | 11.37 | 4.14     |
| MOD PHYS LETT B        | 3.34  | 7.84     | Wu JS                                                       | 2.01  | 7.21     | Physics, Applied                                 | 9.03  | -3.27    |
| ENTROPY-SWITZ          | 3.01  | 2.24     | Arenas A                                                    | 1.67  | 4.72     | Mechanics                                        | 6.35  | 2.34     |
| EPL-EUROPHYS LETT      | 3.01  | 0.78     | Kaski K                                                     | 1.67  | 3.54     | Mathematics, Applied                             | 4.01  | -1.37    |
| NEW J PHYS             | 3.01  | 1.87     | Liu J                                                       | 1.67  | 5.65     | Mathematics, Interdisciplinary Applications      | 3.01  | -1.03    |
| CHAOS                  | 2.68  | 2.43     | Newman MEJ                                                  | 1.67  | 4.30     | Computer Science, Information Systems            | 2.01  | 1.99     |
| INT J MOD PHYS B       | 2.68  | 3.99     | Fortunato S                                                 | 1.34  | 4.02     | Computer Science, Interdisciplinary Applications | 2.01  | -1.87    |



**Cluster 13 (“MODULARITY”).** Most cited publications (according to Web Of Science) and most representative publications (in term of in-degree  $d_{in}$  measuring the number of publications in the cluster that are linked with it) among all publications in the cluster.

| <b>Most Cited publications</b>          |             |                                       |                                                                                                                    |
|-----------------------------------------|-------------|---------------------------------------|--------------------------------------------------------------------------------------------------------------------|
| $d_{in}$                                | Times Cited | Publication Ref                       | Publication Title                                                                                                  |
| 261                                     | 3523        | Fortunato S, 2010, PHYS REP(486)      | Community detection in graphs                                                                                      |
| 140                                     | 888         | Newman MEJ, 2004, EUR PHYS J B(38)    | Detecting community structure in networks                                                                          |
| 202                                     | 842         | Raghavan UN, 2007, PHYS REV E(76)     | Near linear time algorithm to detect community structures in large-scale networks                                  |
| 170                                     | 312         | Lancichinetti A, 2009, PHYS REV E(80) | Benchmarks for testing community detection algorithms on directed and weighted graphs with overlapping communities |
| 151                                     | 282         | De Domenico M, 2013, PHYS REV X(3)    | Mathematical Formulation of Multilayer Networks                                                                    |
| 202                                     | 257         | Arenas A, 2008, NEW J PHYS(10)        | Analysis of the structure of complex networks at different resolution levels                                       |
| 229                                     | 239         | Newman MEJ, 2012, NAT PHYS(8)         | Communities, modules and large-scale structure in networks                                                         |
| 135                                     | 182         | Decelle A, 2011, PHYS REV E(84)       | Asymptotic analysis of the stochastic block model for modular networks and its algorithmic applications            |
| 154                                     | 149         | Nepusz T, 2008, PHYS REV E(77)        | Fuzzy communities and the concept of bridgeness in complex networks                                                |
| 197                                     | 138         | Bassett DS, 2013, CHAOS(23)           | Robust detection of dynamic community structure in networks                                                        |
| 144                                     | 129         | Traud AL, 2012, PHYSICA A(391)        | Social structure of Facebook networks                                                                              |
| 180                                     | 129         | Traag VA, 2009, PHYS REV E(80)        | Community detection in networks with positive and negative links                                                   |
| 97                                      | 127         | Kumpula JM, 2007, PHYS REV LETT(99)   | Emergence of communities in weighted networks                                                                      |
| 243                                     | 126         | Fortunato S, 2016, PHYS REP(659)      | Community detection in networks: A user guide                                                                      |
| <b>Most Representative Publications</b> |             |                                       |                                                                                                                    |
| $d_{in}$                                | Times Cited | Publication Ref                       | Publication Title                                                                                                  |
| 261                                     | 3523        | Fortunato S, 2010, PHYS REP(486)      | Community detection in graphs                                                                                      |
| 243                                     | 126         | Fortunato S, 2016, PHYS REP(659)      | Community detection in networks: A user guide                                                                      |
| 229                                     | 239         | Newman MEJ, 2012, NAT PHYS(8)         | Communities, modules and large-scale structure in networks                                                         |
| 223                                     | 1           | Liu JA, 2010, J STAT MECH-THEORY E()  | Coarse-grained diffusion distance for community structure detection in complex networks                            |
| 218                                     | 66          | Peixoto TP, 2014, PHYS REV X(4)       | Hierarchical Block Structures and High-Resolution Model Selection in Large Networks                                |
| 217                                     | 9           | Wu JS, 2013, PHYSICA A(392)           | Phase transition model for community detection                                                                     |
| 215                                     | 11          | Subelj L, 2014, PHYSICA A(397)        | Group detection in complex networks: An algorithm and comparison of the state of the art                           |
| 213                                     | 0           | Yang JX, 2017, INT J MOD PHYS B(31)   | A spectral method to detect community structure based on distance modularity matrix                                |
| 211                                     | 9           | Badie R, 2013, PHYSICA A(392)         | An efficient agent-based algorithm for overlapping community detection using nodes' closeness                      |
| 209                                     | 4           | Toth B, 2013, J STAT PHYS(151)        | Overlapping Modularity at the Critical Point of k-Clique Percolation                                               |
| 208                                     | 46          | Li HJ, 2015, PHYS REV E(91)           | Social significance of community structure: Statistical view                                                       |
| 208                                     | 4           | Li HJ, 2012, EUR PHYS J B(85)         | Identifying overlapping communities in social networks using multi-scale local information expansion               |
| 207                                     | 20          | Zhang SQ, 2012, PHYS REV E(85)        | Community identification in networks with unbalanced structure                                                     |
| 207                                     | 10          | Jia SW, 2014, IET SYST BIOL(8)        | Anti-triangle centrality-based community detection in complex networks                                             |

**Cluster 13 (“MODULARITY”)**. Most cited and representative authors. For each author, we display the number  $N_a$  of publications their authored in that cluster, the sum  $TC_a$  of their number of citations (according to Web Of Science), and the sum  $k_a$  of their in-degree.

| <b>Most Cited Authors</b> |       |        |       |
|---------------------------|-------|--------|-------|
| <b>Author</b>             | $N_a$ | $TC_a$ | $k_a$ |
| Fortunato S               | 4     | 3974   | 768   |
| Newman MEJ                | 5     | 1191   | 575   |
| Albert R                  | 3     | 868    | 342   |
| Kumara S                  | 1     | 842    | 202   |
| Raghavan UN               | 1     | 842    | 202   |
| Porter MA                 | 9     | 759    | 1529  |
| Arenas A                  | 5     | 638    | 654   |
| Gomez S                   | 3     | 560    | 489   |
| Mucha PJ                  | 7     | 462    | 1222  |
| Lancichinetti A           | 2     | 374    | 318   |
| De Domenico M             | 3     | 351    | 418   |
| Cozzo E                   | 2     | 283    | 178   |
| Moreno Y                  | 2     | 283    | 178   |
| Kivela M                  | 1     | 282    | 151   |
| Sole-Ribalta A            | 2     | 282    | 240   |
| Fernandez A               | 1     | 257    | 202   |
| Zdeborova L               | 3     | 225    | 331   |
| Kaski K                   | 5     | 215    | 596   |
| Moore C                   | 3     | 200    | 344   |

| <b>Most Representative Authors</b> |       |        |       |
|------------------------------------|-------|--------|-------|
| <b>Author</b>                      | $N_a$ | $TC_a$ | $k_a$ |
| Porter MA                          | 9     | 759    | 1529  |
| Mucha PJ                           | 7     | 462    | 1222  |
| Jiao LC                            | 7     | 74     | 1190  |
| Wu JS                              | 6     | 67     | 1052  |
| Liu J                              | 5     | 45     | 815   |
| Fortunato S                        | 4     | 3974   | 768   |
| Li HJ                              | 6     | 73     | 691   |
| Arenas A                           | 5     | 638    | 654   |
| Kaski K                            | 5     | 215    | 596   |
| Newman MEJ                         | 5     | 1191   | 575   |
| Subelj L                           | 3     | 31     | 552   |
| Bajec M                            | 3     | 31     | 552   |
| Zhang ZY                           | 4     | 10     | 512   |
| Saramaki J                         | 4     | 198    | 496   |
| Gomez S                            | 3     | 560    | 489   |
| Peixoto TP                         | 4     | 112    | 461   |
| Chen DB                            | 3     | 7      | 456   |
| Sales-Pardo M                      | 4     | 54     | 437   |
| De Domenico M                      | 3     | 351    | 418   |

Cluster 26 (“SOCIAL FORCE MODEL”). This cluster contains  $N = 279$  publications.

| <b>Keywords</b>          | f(%)  | $\sigma$ | <b>Institution</b>         | f(%)  | $\sigma$ | <b>Reference</b>                                  | f(%)  | $\sigma$ |
|--------------------------|-------|----------|----------------------------|-------|----------|---------------------------------------------------|-------|----------|
| DYNAMICS                 | 34.77 | 4.08     | UNIV SCI & TECHNOL CHINA   | 7.89  | 8.97     | Helbing D, 2000, NATURE, 407, 487                 | 48.03 | 51.12    |
| SIMULATION               | 25.45 | 28.65    | DEPT MATH                  | 7.17  | 2.42     | Helbing D, 1995, PHYS REV E, 51, 4282             | 47.31 | 55.18    |
| SOCIAL FORCE MODEL       | 25.45 | 38.22    | DEPT PHYS                  | 6.81  | -3.61    | Burstedde C, 2001, PHYSICA A, 295, 507            | 22.94 | 40.13    |
| BEHAVIOR                 | 21.51 | 8.94     | BEIJING JIAOTONG UNIV      | 5.38  | 7.86     | Helbing D, 2001, REV MOD PHYS, 73, 1067           | 17.92 | 28.70    |
| FLOW                     | 17.20 | 22.51    | STATE KEY LAB FIRE SCI     | 4.30  | 16.80    | Vicsek T, 1995, PHYS REV LETT, 75, 1226           | 17.20 | 23.14    |
| MODEL                    | 12.19 | -0.38    | DEPT FIS                   | 3.58  | 1.02     | Castellano C, 2009, REV MOD PHYS, 81, 591         | 16.85 | -0.90    |
| SYSTEMS                  | 11.11 | 3.07     | CNRS                       | 3.23  | 1.54     | Helbing D, 2007, PHYS REV E, 75, 0                | 16.13 | 31.95    |
| EVACUATION               | 9.68  | 23.20    | DEPT CIVIL ENGN            | 3.23  | 7.94     | Muramatsu M, 1999, PHYSICA A, 267, 487            | 14.34 | 31.78    |
| CELLULAR-AUTOMATON       | 8.24  | 20.86    | SCH MANAGEMENT             | 3.23  | 2.50     | Helbing D, 2005, TRANSPORT SCI, 39, 1             | 13.62 | 29.74    |
| JAMMING TRANSITION       | 7.53  | 20.34    | HONG KONG                  | 2.87  | 4.20     | Kirchner A, 2002, PHYSICA A, 312, 260             | 13.62 | 30.95    |
| PEDESTRIAN DYNAMICS      | 7.53  | 20.34    | STATE KEY LAB RAIL TRAFF   | 2.87  | 12.69    | Parisi DR, 2009, PHYSICA A, 388, 3600             | 13.26 | 30.96    |
| ANIMAL GROUPS            | 6.45  | 16.87    | CONTROL & SAFETY           |       |          | Lakoba TI, 2005, SIMUL-T SOC MOD SIM, 81, 339     | 12.19 | 29.22    |
| CELLULAR-AUTOMATON MODEL | 6.09  | 17.65    | SCH ECON & MANAGEMENT      | 2.51  | 2.24     | Hughes RL, 2002, TRANSPORT RES B-METH, 36, 507    | 11.83 | 29.23    |
| MOTION                   | 5.38  | 12.66    | SCH ELECT & INFORMAT ENGN  | 2.51  | 3.34     | Kirchner A, 2003, PHYS REV E, 67, 0               | 11.11 | 28.33    |
| PHASE-TRANSITION         | 5.38  | 7.35     | SCH SCI                    | 2.51  | 0.66     | Couzin ID, 2002, J THEOR BIOL, 218, 1             | 9.68  | 24.54    |
| CROWD                    | 4.30  | 13.93    | BEIHANG UNIV               | 2.15  | 2.22     | Henderson LF, 1971, NATURE, 229, 381              | 9.32  | 24.93    |
| ESCAPE                   | 4.30  | 15.08    | DEPT MECH & AEROSP ENGN    | 2.15  | 8.06     | Moussaid M, 2011, P NATL ACAD SCI USA, 108, 6884  | 9.32  | 24.46    |
| PARTICLES                | 4.30  | 13.44    | EOTVOS LORAND UNIV         | 2.15  | 3.71     | Helbing D, 2000, PHYS REV LETT, 84, 1240          | 8.96  | 24.90    |
| PHYSICS                  | 4.30  | 2.18     | FAC CIENCIAS EXACTAS & NAT | 2.15  | 4.61     | Johansson Anders, 2007, ADV COMPLEX SYST, 10, 271 | 8.60  | 24.38    |
| CROWD DYNAMICS           | 3.94  | 14.38    | INST THEORET PHYS          | 2.15  | -0.24    | Moussaid M, 2010, PLOS ONE, 5, 0                  | 8.24  | 23.84    |
| <b>Title Words</b>       | f(%)  | $\sigma$ | INTERDISCIPLINARY GRAD SCH | 2.15  | 4.40     | <b>RefJournal</b>                                 | f(%)  | $\sigma$ |
| MODEL                    | 29.03 | 7.76     | ENGN SCI                   |       |          | PHYS REV E                                        | 83.51 | 8.23     |
| PEDESTRIAN               | 28.67 | 45.22    | <b>Country</b>             | f(%)  | $\sigma$ | NATURE                                            | 71.33 | 8.63     |
| EVACUATION               | 20.79 | 38.51    | Peoples R China            | 38.35 | 4.94     | PHYSICA A                                         | 70.97 | 6.23     |
| SOCIAL                   | 17.56 | 1.27     | USA                        | 20.79 | 0.20     | PHYS REV LETT                                     | 44.44 | -1.20    |
| DYNAMICS                 | 16.85 | 4.46     | Germany                    | 9.68  | 1.80     | P NATL ACAD SCI USA                               | 36.56 | -0.16    |
| FLOW                     | 11.47 | 19.01    | Japan                      | 8.96  | 3.50     | REV MOD PHYS                                      | 35.84 | 1.31     |
| CROWD                    | 9.32  | 25.18    | France                     | 5.02  | 0.61     | J STAT MECH-THEORY E                              | 27.60 | 5.86     |
| SIMULATION               | 8.96  | 13.25    | Italy                      | 4.66  | -1.93    | TRANSPORT RES B-METH                              | 24.73 | 37.65    |
| FORCE                    | 8.24  | 22.16    | UK                         | 3.94  | -2.17    | SCIENCE                                           | 23.66 | -4.20    |
| COLLECTIVE               | 6.81  | 7.88     | Argentina                  | 3.58  | 2.56     | PLOS ONE                                          | 22.94 | 1.36     |
| <b>Journal</b>           | f(%)  | $\sigma$ | India                      | 3.23  | 1.03     | <b>Subject</b>                                    | f(%)  | $\sigma$ |
| PHYSICA A                | 33.33 | 3.23     | Hungary                    | 2.87  | 0.70     | Physics, Multidisciplinary                        | 59.50 | 3.07     |
| PHYS REV E               | 15.77 | 2.39     | <b>Author</b>              | f(%)  | $\sigma$ | Physics, Mathematical                             | 29.39 | 1.10     |
| CHINESE PHYS B           | 4.66  | 10.60    | Song WG                    | 3.58  | 16.23    | Physics, Fluids & Plasmas                         | 15.77 | 1.63     |
| EUR PHYS J B             | 3.58  | 0.93     | Helbing D                  | 2.87  | 6.47     | Mathematics, Applied                              | 6.81  | 0.67     |
| PHYS LETT A              | 2.51  | 2.49     | Dong HR                    | 2.51  | 13.58    | Physics, Condensed Matter                         | 5.38  | -0.29    |
| EUR PHYS J-SPEC TOP      | 2.15  | 1.40     | Jiang R                    | 2.51  | 11.18    | Computer Science, Interdisciplinary Applications  | 2.87  | -1.09    |
| J STAT MECH-THEORY E     | 2.15  | -0.21    | Dorso CO                   | 2.15  | 9.50     | Mechanics                                         | 2.87  | -0.80    |
| INT J MOD PHYS C         | 1.79  | -1.10    | Porfiri M                  | 2.15  | 12.57    | Physics, Applied                                  | 2.87  | -5.97    |
| PHYS REV LETT            | 1.79  | 0.76     | Tanimoto J                 | 2.15  | 5.04     | Engineering, Electrical & Electronic              | 1.79  | -2.02    |
| SIAM J APPL DYN SYST     | 1.79  | 6.41     | Wang BH                    | 2.15  | 2.97     | Mathematics, Interdisciplinary Applications       | 1.79  | -2.01    |
|                          |       |          | Yang XX                    | 2.15  | 12.57    |                                                   |       |          |
|                          |       |          | Hu MB                      | 1.79  | 7.40     |                                                   |       |          |

**Cluster 26 (“SOCIAL FORCE MODEL”).** Most cited publications (according to Web Of Science) and most representative publications (in term of in-degree  $d_{in}$  measuring the number of publications in the cluster that are linked with it) among all publications in the cluster.

| <b>Most Cited publications</b>          |             |                                           |                                                                                                                          |
|-----------------------------------------|-------------|-------------------------------------------|--------------------------------------------------------------------------------------------------------------------------|
| $d_{in}$                                | Times Cited | Publication Ref                           | Publication Title                                                                                                        |
| 13                                      | 1834        | HELBING D, 1995, PHYS REV E(51)           | SOCIAL FORCE MODEL FOR PEDESTRIAN DYNAMICS                                                                               |
| 7                                       | 1319        | Acebron JA, 2005, REV MOD PHYS(77)        | The Kuramoto model: A simple paradigm for synchronization phenomena                                                      |
| 56                                      | 813         | Vicsek T, 2012, PHYS REP(517)             | Collective motion                                                                                                        |
| 5                                       | 159         | WEIDLICH W, 1991, PHYS REP(204)           | PHYSICS AND SOCIAL-SCIENCE - THE APPROACH OF SYNERGETICS                                                                 |
| 67                                      | 141         | Song WG, 2006, PHYSICA A(363)             | Simulation of evacuation processes using a multi-grid model for pedestrian dynamics                                      |
| 4                                       | 125         | ten Hagen B, 2011, J PHYS-CONDENS MAT(23) | Brownian motion of a self-propelled particle                                                                             |
| 86                                      | 117         | Seyfried A, 2006, PHYSICA A(368)          | Basics of modelling the pedestrian flow                                                                                  |
| 78                                      | 104         | Parisi DR, 2009, PHYSICA A(388)           | A modification of the Social Force Model can reproduce experimental data of pedestrian flows in normal conditions        |
| 22                                      | 103         | Parisi DR, 2005, PHYSICA A(354)           | Microscopic dynamics of pedestrian evacuation                                                                            |
| 105                                     | 89          | Yu W, 2007, PHYS REV E(76)                | Modeling crowd turbulence by many-particle simulations                                                                   |
| 59                                      | 82          | Guo RY, 2008, PHYSICA A(387)              | A mobile lattice gas model for simulating pedestrian evacuation                                                          |
| 86                                      | 76          | Song WG, 2006, PHYSICA A(371)             | Evacuation behaviors at exit in CA model with force essentials: A comparison with social force model                     |
| 82                                      | 75          | Yu YF, 2007, PHYS REV E(75)               | Cellular automaton simulation of pedestrian counter flow considering the surrounding environment                         |
| 34                                      | 70          | Parisi DR, 2007, PHYSICA A(385)           | Morphological and dynamical aspects of the room evacuation process                                                       |
| <b>Most Representative Publications</b> |             |                                           |                                                                                                                          |
| $d_{in}$                                | Times Cited | Publication Ref                           | Publication Title                                                                                                        |
| 141                                     | 0           | Sun Y, 2018, PHYSICA A(505)               | Kinetic Monte Carlo simulations of two-dimensional pedestrian flow models                                                |
| 138                                     | 0           | Kwak J, 2017, PHYS REV E(96)              | Jamming transitions induced by an attraction in pedestrian flow                                                          |
| 134                                     | 34          | Chowhury D, 2004, PHASE TRANSIT(77)       | Self-organized patterns and traffic flow in colonies of organisms: From bacteria and social insects to vertebrates       |
| 131                                     | 35          | Ha V, 2012, PHYSICA A(391)                | Agent-based modeling of a multi-room multi-floor building emergency evacuation                                           |
| 128                                     | 11          | Wang QL, 2015, CHINESE PHYS B(24)         | A new collision avoidance model for pedestrian dynamics                                                                  |
| 127                                     | 17          | Dai JC, 2013, PHYSICA A(392)              | Simulation of pedestrian counter flow through bottlenecks by using an agent-based model                                  |
| 127                                     | 13          | Hao QY, 2010, PHYS REV E(82)              | Pedestrian flow in a lattice gas model with parallel update                                                              |
| 124                                     | 59          | Karamouzas I, 2014, PHYS REV LETT(113)    | Universal Power Law Governing Pedestrian Interactions                                                                    |
| 124                                     | 6           | Guo F, 2016, PHYSICA A(462)               | An extended cost potential field cellular automata model considering behavior variation of pedestrian flow               |
| 123                                     | 1           | Qu YC, 2018, PHYSICA A(492)               | Modeling detour behavior of pedestrian dynamics under different conditions                                               |
| 119                                     | 2           | Zhao YX, 2017, PHYS LETT A(381)           | The self-slowng behavioral mechanism of pedestrians under normal and emergency conditions                                |
| 118                                     | 4           | Li XL, 2017, PHYSICA A(487)               | Effect of psychological tension on pedestrian counter flow via an extended cost potential field cellular automaton model |
| 117                                     | 5           | Tian HH, 2015, PHYSICA A(420)             | Influence of the exits' configuration on evacuation process in a room without obstacle                                   |
| 116                                     | 26          | Hao QY, 2011, PHYS REV E(84)              | Pedestrian flow dynamics in a lattice gas model coupled with an evolutionary game                                        |

**Cluster 26 (“SOCIAL FORCE MODEL”).** Most cited and representative authors. For each author, we display the number  $N_a$  of publications their authored in that cluster, the sum  $TC_a$  of their number of citations (according to Web Of Science), and the sum  $k_a$  of their in-degree.

| <b>Most Cited Authors</b> |       |        |       |
|---------------------------|-------|--------|-------|
| <b>Author</b>             | $N_a$ | $TC_a$ | $k_a$ |
| Helbing D                 | 8     | 2039   | 169   |
| Molnar P                  | 1     | 1834   | 13    |
| Spigler R                 | 1     | 1319   | 7     |
| Bonilla LL                | 1     | 1319   | 7     |
| Ritort F                  | 1     | 1319   | 7     |
| Acebron JA                | 1     | 1319   | 7     |
| Vicente CJP               | 1     | 1319   | 7     |
| Vicsek T                  | 5     | 824    | 129   |
| Zafeiris A                | 1     | 813    | 56    |
| Song WG                   | 10    | 435    | 830   |
| Wang BH                   | 6     | 308    | 493   |
| Parisi DR                 | 5     | 303    | 271   |
| Dorso CO                  | 6     | 230    | 212   |
| Weidlich W                | 3     | 173    | 10    |
| Johansson A               | 2     | 156    | 183   |
| Yu YF                     | 2     | 151    | 168   |
| Ni SJ                     | 1     | 141    | 67    |
| Xu X                      | 1     | 141    | 67    |
| Ten Hagen B               | 1     | 125    | 4     |

| <b>Most Representative Authors</b> |       |        |       |
|------------------------------------|-------|--------|-------|
| <b>Author</b>                      | $N_a$ | $TC_a$ | $k_a$ |
| Song WG                            | 10    | 435    | 830   |
| Jiang R                            | 7     | 45     | 695   |
| Hu MB                              | 5     | 41     | 533   |
| Wang BH                            | 6     | 308    | 493   |
| Dong HR                            | 7     | 61     | 450   |
| Guo N                              | 4     | 4      | 405   |
| Jia B                              | 4     | 30     | 371   |
| Nishinari K                        | 4     | 88     | 344   |
| Yang XX                            | 6     | 50     | 322   |
| Kuang H                            | 3     | 26     | 312   |
| Shuaib MM                          | 3     | 13     | 292   |
| Guo RY                             | 3     | 103    | 279   |
| Wang QL                            | 4     | 55     | 276   |
| Gong JH                            | 4     | 26     | 274   |
| Shen S                             | 4     | 26     | 274   |
| Li WH                              | 4     | 26     | 274   |
| Yu P                               | 4     | 26     | 274   |
| Parisi DR                          | 5     | 303    | 271   |
| Ma Y                               | 3     | 14     | 264   |

Cluster 25 (“HEAVY TAILS”). This cluster contains  $N = 152$  publications.

| Keywords             | f(%)        | $\sigma$                   | Institution                    | f(%)        | $\sigma$                   | Reference                                          | f(%)        | $\sigma$                   |
|----------------------|-------------|----------------------------|--------------------------------|-------------|----------------------------|----------------------------------------------------|-------------|----------------------------|
| NETWORKS             | 21.05       | 5.38                       | DEPT PHYS                      | 25.00       | 3.72                       | Barabasi AL, 2005, NATURE, 435, 207                | 48.03       | 39.31                      |
| DYNAMICS             | 19.74       | -1.31                      | UNIV ELECT SCI & TECHNOL       | 10.53       | 8.97                       | Castellano C, 2009, REV MOD PHYS, 81, 591          | 27.63       | 2.73                       |
| PATTERNS             | 15.79       | 13.69                      | CHINA                          |             |                            | Vazquez A, 2006, PHYS REV E, 73, 0                 | 26.32       | 34.71                      |
| SYSTEMS              | 15.79       | 4.59                       | WEB SCI CTR                    | 9.21        | 10.01                      | Gonzalez MC, 2008, NATURE, 453, 779                | 19.08       | 18.79                      |
| HEAVY TAILS          | 15.13       | 22.83                      | RES CTR COMPLEX SYST SCI       | 8.55        | 13.58                      | Malmgren RD, 2008, P NATL ACAD SCI USA, 105, 18153 | 17.11       | 27.80                      |
| HUMAN DYNAMICS       | 15.13       | 22.22                      | UNIV FRIBOURG                  | 8.55        | 10.79                      | Oliveira JG, 2005, NATURE, 437, 1251               | 17.11       | 26.80                      |
| BEHAVIOR             | 11.84       | 2.06                       | UNIV SHANGHAI SCI & TECHNOL    | 7.89        | 11.67                      | Goh KI, 2008, EPL-EUROPHYS LETT, 81, 0             | 15.79       | 29.08                      |
| HUMAN MOBILITY       | 9.21        | 15.95                      | AALTO UNIV                     | 7.24        | 8.21                       | Brockmann D, 2006, NATURE, 439, 462                | 13.82       | 18.17                      |
| COMMUNICATION        | 8.55        | 7.89                       | DEPT COMP SCI                  | 5.92        | 3.25                       | Karsai M, 2012, SCI REP-UK, 2, 0                   | 13.82       | 24.94                      |
| MODEL                | 7.89        | -1.86                      | SCH SCI                        | 5.92        | 3.52                       | Song CM, 2010, SCIENCE, 327, 1018                  | 13.82       | 21.47                      |
| RECOMMENDER SYSTEMS  | 6.58        | 13.73                      | DEPT MATH                      | 5.26        | 0.62                       | Zhou T, 2008, EPL-EUROPHYS LETT, 82, 0             | 13.16       | 25.34                      |
| BURSTS               | 5.92        | 15.54                      | UNIV SCI & TECHNOL CHINA       | 5.26        | 3.92                       | Dezso Z, 2006, PHYS REV E, 73, 0                   | 12.50       | 25.41                      |
| MEMORY               | 5.92        | 6.70                       | DEPT MANAGEMENT TECHNOL & ECON | 4.61        | 9.72                       | Vazquez A, 2007, PHYS REV LETT, 98, 0              | 12.50       | 16.64                      |
| DISTRIBUTIONS        | 4.61        | 1.80                       | DEPT MODERN PHYS               | 4.61        | 5.06                       | Eckmann JP, 2004, P NATL ACAD SCI USA, 101, 14333  | 11.84       | 17.43                      |
| MODELS               | 4.61        | 0.36                       | DEPT THEORET PHYS              | 4.61        | 4.55                       | Malmgren RD, 2009, SCIENCE, 325, 1696              | 11.84       | 22.34                      |
| COMPLEX NETWORKS     | 3.95        | -3.90                      | SHANGHAI UNIV FINANCE & ECON   | 4.61        | 12.32                      | Zhou T, 2010, P NATL ACAD SCI USA, 107, 4511       | 11.84       | 22.34                      |
| SOCIAL NETWORKS      | 3.95        | -1.82                      | BIG DATA RES CTR               | 3.95        | 5.28                       | Lazer D, 2009, SCIENCE, 323, 721                   | 11.18       | 11.01                      |
| TIME                 | 3.95        | 2.92                       | CHINESE ACAD SCI               | 3.95        | 3.06                       | Wu Y, 2010, P NATL ACAD SCI USA, 107, 18803        | 9.87        | 18.17                      |
| DIVERSITY            | 3.29        | 2.57                       | ETH                            | 3.95        | 4.55                       | Zhou T, 2007, PHYS REV E, 76, 0                    | 9.87        | 15.86                      |
| EVOLUTION            | 3.29        | -1.61                      | JOZEF STEFAN INST              | 3.95        | 10.49                      | Radicchi F, 2009, PHYS REV E, 80, 0                | 9.21        | 14.36                      |
| <b>Title Words</b>   | <b>f(%)</b> | <b><math>\sigma</math></b> | POHANG UNIV SCI & TECHNOL      | 3.95        | 8.04                       | <b>RefJournal</b>                                  | <b>f(%)</b> | <b><math>\sigma</math></b> |
| SOCIAL               | 19.74       | 1.69                       | <b>Country</b>                 | <b>f(%)</b> | <b><math>\sigma</math></b> | PHYS REV E                                         | 75.66       | 4.10                       |
| HUMAN                | 19.08       | 17.69                      | Peoples R China                | 42.76       | 4.89                       | NATURE                                             | 70.39       | 6.14                       |
| DYNAMICS             | 18.42       | 3.96                       | Switzerland                    | 15.13       | 9.17                       | PHYSICA A                                          | 70.39       | 4.46                       |
| ONLINE               | 13.82       | 11.09                      | USA                            | 15.13       | -1.59                      | P NATL ACAD SCI USA                                | 65.79       | 7.34                       |
| NETWORKS             | 12.50       | -1.83                      | UK                             | 8.55        | 0.58                       | SCIENCE                                            | 57.24       | 5.54                       |
| MODEL                | 9.21        | -1.48                      | Finland                        | 7.89        | 6.98                       | PHYS REV LETT                                      | 55.26       | 1.78                       |
| MOBILITY             | 7.24        | 12.03                      | South Korea                    | 7.24        | 3.67                       | PLOS ONE                                           | 47.37       | 8.57                       |
| RECOMMENDATION       | 7.24        | 18.11                      | Italy                          | 5.26        | -1.15                      | EPL-EUROPHYS LETT                                  | 46.71       | 8.57                       |
| PATTERNS             | 6.58        | 7.48                       | Austria                        | 3.95        | 3.86                       | EUR PHYS J B                                       | 38.82       | 1.81                       |
| SYSTEMS              | 6.58        | 2.25                       | Russia                         | 3.95        | 1.12                       | REV MOD PHYS                                       | 37.50       | 1.40                       |
| <b>Journal</b>       | <b>f(%)</b> | <b><math>\sigma</math></b> | Slovenia                       | 3.95        | 3.03                       | <b>Subject</b>                                     | <b>f(%)</b> | <b><math>\sigma</math></b> |
| PHYSICA A            | 30.26       | 1.51                       | <b>Author</b>                  | <b>f(%)</b> | <b><math>\sigma</math></b> | Physics, Multidisciplinary                         | 50.00       | -0.08                      |
| PHYS REV E           | 15.79       | 1.77                       | Zhang YC                       | 7.89        | 12.82                      | Physics, Mathematical                              | 27.63       | 0.32                       |
| EUR PHYS J B         | 7.89        | 3.97                       | Guo Q                          | 7.24        | 18.11                      | Physics, Fluids & Plasmas                          | 15.79       | 1.21                       |
| INT J MOD PHYS C     | 4.61        | 1.25                       | Liu JG                         | 7.24        | 14.56                      | Physics, Condensed Matter                          | 8.55        | 1.46                       |
| PLOS ONE             | 4.61        | 3.91                       | Zhou T                         | 5.92        | 8.21                       | Multidisciplinary Sciences                         | 7.89        | 2.98                       |
| EPL-EUROPHYS LETT    | 3.95        | 1.32                       | Jo HH                          | 5.26        | 11.10                      | Computer Science, Interdisciplinary Applications   | 5.26        | 0.67                       |
| J STAT MECH-THEORY E | 3.95        | 1.31                       | Sornette D                     | 5.26        | 7.68                       | Mechanics                                          | 3.95        | 0.11                       |
| PHYS REV LETT        | 3.29        | 2.20                       | Tadic B                        | 3.95        | 13.24                      | Computer Science, Information Systems              | 1.97        | 1.38                       |
| CHINESE PHYS LETT    | 2.63        | 4.14                       | Han XP                         | 3.29        | 9.93                       | Computer Science, Theory & Methods                 | 1.32        | -0.16                      |
| ENTROPY-SWITZ        | 1.97        | 0.53                       | Wang BH                        | 3.29        | 3.90                       | Mathematics, Interdisciplinary Applications        | 1.32        | -1.78                      |
|                      |             |                            | Cimini G                       | 2.63        | 12.58                      |                                                    |             |                            |

**Cluster 25 (“HEAVY TAILS”).** Most cited publications (according to Web Of Science) and most representative publications (in term of in-degree  $d_{in}$  measuring the number of publications in the cluster that are linked with it) among all publications in the cluster.

|          |             |                                             | <b>Most Cited publications</b>                                                                                |  |
|----------|-------------|---------------------------------------------|---------------------------------------------------------------------------------------------------------------|--|
| $d_{in}$ | Times Cited | Publication Ref                             | Publication Title                                                                                             |  |
| 41       | 1032        | Song CM, 2010, SCIENCE(327)                 | Limits of Predictability in Human Mobility                                                                    |  |
| 8        | 317         | Batty M, 2012, EUR PHYS J-SPEC TOP(214)     | Smart cities of the future                                                                                    |  |
| 36       | 174         | Iribarren JL, 2009, PHYS REV LETT(103)      | Impact of Human Activity Patterns on the Dynamics of Information Diffusion                                    |  |
| 4        | 138         | Zhang YC, 2007, PHYS REV LETT(99)           | Heat conduction process on community networks as a recommendation model                                       |  |
| 40       | 70          | Petersen AM, 2011, P NATL ACAD SCI USA(108) | Quantitative and empirical demonstration of the Matthew effect in a study of career longevity                 |  |
| 53       | 63          | Radicchi F, 2009, PHYS REV E(80)            | Human activity in the web                                                                                     |  |
| 42       | 54          | Min B, 2011, PHYS REV E(83)                 | Spreading dynamics following bursty human activity patterns                                                   |  |
| 19       | 52          | Csaji BC, 2013, PHYSICA A(392)              | Exploring the mobility of mobile phone users                                                                  |  |
| 19       | 51          | Hasan S, 2013, J STAT PHYS(151)             | Spatiotemporal Patterns of Urban Human Mobility                                                               |  |
| 1        | 51          | Bazzani A, 2010, J STAT MECH-THEORY E()     | Statistical laws in urban mobility from microscopic GPS data in the area of Florence                          |  |
| 1        | 46          | Sornette D, 2003, PHYSICA A(318)            | Endogenous versus exogenous shocks in systems with memory                                                     |  |
| 23       | 45          | Peng CB, 2012, PLOS ONE(7)                  | Collective Human Mobility Pattern from Taxi Trips in Urban Area                                               |  |
| 28       | 45          | Yan Q, 2013, PHYSICA A(392)                 | Social network based microblog user behavior analysis                                                         |  |
| 41       | 44          | Oliveira JG, 2009, PHYSICA A(388)           | Impact of interactions on human dynamics                                                                      |  |
|          |             |                                             | <b>Most Representative Publications</b>                                                                       |  |
| $d_{in}$ | Times Cited | Publication Ref                             | Publication Title                                                                                             |  |
| 85       | 28          | Zhao ZD, 2013, SCI REP-UK(3)                | Emergence of scaling in human-interest dynamics                                                               |  |
| 59       | 4           | Kim J, 2013, PLOS ONE(8)                    | Microscopic Modelling Circadian and Bursty Pattern of Human Activities                                        |  |
| 59       | 3           | Peng D, 2015, PHYSICA A(436)                | Punctuated equilibrium dynamics in human communications                                                       |  |
| 57       | 9           | Jiang ZQ, 2016, J STAT MECH-THEORY E()      | Two-state Markov-chain Poisson nature of individual cellphone call statistics                                 |  |
| 56       | 4           | Guo Q, 2017, PHYSICA A(468)                 | Evolution properties of online user preference diversity                                                      |  |
| 54       | 12          | Mryglod O, 2015, PHYSICA A(419)             | Interevent time distributions of human multi-level activity in a virtual world                                |  |
| 53       | 63          | Radicchi F, 2009, PHYS REV E(80)            | Human activity in the web                                                                                     |  |
| 53       | 26          | Saramaki J, 2015, EUR PHYS J B(88)          | From seconds to months: an overview of multi-scale dynamics of mobile telephone calls                         |  |
| 53       | 25          | Zhou T, 2012, EPL-EUROPHYS LETT(97)         | Relative clock verifies endogenous bursts of human dynamics                                                   |  |
| 53       | 5           | Ross GJ, 2015, PHYS REV E(91)               | Understanding the heavy-tailed dynamics in human behavior                                                     |  |
| 53       | 1           | Ito H, 2015, PHYS REV E(92)                 | Universal bursty behavior in the air transportation system                                                    |  |
| 51       | 5           | Panzarasa P, 2015, PHYS REV E(92)           | Emergence of long-range correlations and bursty activity patterns in online communication                     |  |
| 50       | 11          | Jo HH, 2012, EPJ DATA SCI(1)                | Spatiotemporal correlations of handset-based service usages                                                   |  |
| 50       | 5           | Wang CX, 2015, PHYSICA A(428)               | Modeling the heterogeneity of human dynamics based on the measurements of influential users in Sina Microblog |  |

**Cluster 25 (“HEAVY TAILS”).** Most cited and representative authors. For each author, we display the number  $N_a$  of publications their authored in that cluster, the sum  $TC_a$  of their number of citations (according to Web Of Science), and the sum  $k_a$  of their in-degree.

| Most Cited Authors |       |        |       |
|--------------------|-------|--------|-------|
| Author             | $N_a$ | $TC_a$ | $k_a$ |
| Song CM            | 2     | 1035   | 86    |
| Qu ZH              | 1     | 1032   | 41    |
| Blumm N            | 1     | 1032   | 41    |
| Barabasi AL        | 1     | 1032   | 41    |
| Bazzani A          | 3     | 373    | 27    |
| Axhausen KW        | 1     | 317    | 8     |
| Portugali Y        | 1     | 317    | 8     |
| Pozdnoukhov A      | 1     | 317    | 8     |
| Ouzounis G         | 1     | 317    | 8     |
| Wachowicz M        | 1     | 317    | 8     |
| Batty M            | 1     | 317    | 8     |
| Giannotti F        | 1     | 317    | 8     |
| Zhang YC           | 12    | 211    | 147   |
| Moro E             | 2     | 200    | 89    |
| Iribarren JL       | 1     | 174    | 36    |
| Yu YK              | 1     | 138    | 4     |
| Blattner M         | 1     | 138    | 4     |
| Zhou T             | 9     | 132    | 243   |
| Sornette D         | 8     | 111    | 220   |

| Most Representative Authors |       |        |       |
|-----------------------------|-------|--------|-------|
| Author                      | $N_a$ | $TC_a$ | $k_a$ |
| Jo HH                       | 8     | 56     | 301   |
| Zhou T                      | 9     | 132    | 243   |
| Sornette D                  | 8     | 111    | 220   |
| Liu JG                      | 11    | 50     | 215   |
| Guo Q                       | 11    | 50     | 215   |
| Kaski K                     | 4     | 47     | 176   |
| Han XP                      | 5     | 23     | 158   |
| Wang BH                     | 5     | 23     | 158   |
| Yang ZM                     | 3     | 56     | 155   |
| Zhang YC                    | 12    | 211    | 147   |
| Zhao ZD                     | 2     | 53     | 138   |
| Zhang ZK                    | 4     | 42     | 112   |
| Lai YC                      | 2     | 31     | 111   |
| Perotti JI                  | 3     | 26     | 104   |
| Pan RK                      | 3     | 45     | 101   |
| Li RD                       | 3     | 0      | 96    |
| Zhou CS                     | 2     | 36     | 94    |
| Wei ZW                      | 2     | 6      | 91    |
| Moro E                      | 2     | 200    | 89    |



Cluster 10 (“INTERTEMPORAL CHOICE”). This cluster contains  $N = 87$  publications.

| Keywords             | f(%)        | $\sigma$                   | Institution                     | f(%)        | $\sigma$                   | Reference                                                                    | f(%)        | $\sigma$                   |
|----------------------|-------------|----------------------------|---------------------------------|-------------|----------------------------|------------------------------------------------------------------------------|-------------|----------------------------|
| STRATEGIES           | 26.44       | 18.46                      | INST PHYS                       | 16.09       | 9.42                       | Eisert J, 1999, PHYS REV LETT, 83, 3077                                      | 34.48       | 44.77                      |
| DECISION-MAKING      | 12.64       | 12.75                      | UNIV BIALYSTOK                  | 16.09       | 29.77                      | Meyer DA, 1999, PHYS REV LETT, 82, 1052                                      | 33.33       | 46.40                      |
| DYNAMICS             | 11.49       | -2.79                      | SILESIAN UNIV                   | 13.79       | 27.81                      | Busemeyer JR, 2006, J MATH PSYCHOL, 50, 220                                  | 19.54       | 37.40                      |
| MECHANICS            | 10.34       | 13.38                      | INST THEORET PHYS               | 12.64       | 6.31                       | Cajueiro DO, 2006, PHYSICA A, 364, 385                                       | 17.24       | 36.16                      |
| RISK                 | 10.34       | 12.29                      | UNIV LEICESTER                  | 12.64       | 19.39                      | Piotrowski EW, 2002, PHYSICA A, 312, 208                                     | 14.94       | 33.66                      |
| UNCERTAINTY          | 9.20        | 14.35                      | SCH MANAGEMENT                  | 9.20        | 6.06                       | Eisert J, 2000, J MOD OPTIC, 47, 2543                                        | 13.79       | 31.04                      |
| CHOICE               | 8.05        | 11.36                      | DEPT BEHAV SCI                  | 8.05        | 21.63                      | Takahashi T, 2005, MED HYPOTHESES, 65, 691                                   | 12.64       | 30.96                      |
| GAMES                | 8.05        | 5.56                       | INT CTR MATH MODELING PHYS      | 8.05        | 24.61                      | Benjamin SC, 2001, PHYS REV A, 64, 0                                         | 11.49       | 26.89                      |
| INTERFERENCE         | 8.05        | 19.53                      | & COGNIT SCI                    |             |                            | Du JF, 2002, PHYS REV LETT, 88, 0                                            | 11.49       | 26.89                      |
| INTERTEMPORAL CHOICE | 8.05        | 22.23                      | LEICESTER                       | 8.05        | 21.63                      | Piotrowski EW, 2003, INT J THEOR PHYS, 42, 1089                              | 11.49       | 29.52                      |
| MODEL                | 8.05        | -1.36                      | SAPPORO                         | 8.05        | 15.54                      | Takahashi T, 2006, MED HYPOTHESES, 67, 1372                                  | 11.49       | 29.52                      |
| INFORMATION          | 6.90        | 3.36                       | UNIV VAXJO                      | 8.05        | 22.98                      | Takahashi T, 2007, PHYSICA A, 385, 637                                       | 11.49       | 29.52                      |
| EXPLANATION          | 5.75        | 12.46                      | HOKKAIDO UNIV                   | 6.90        | 13.69                      | Tversky A, 1992, PSYCHOL SCI, 3, 305                                         | 11.49       | 29.52                      |
| TIME                 | 5.75        | 3.70                       | LINNAEUS UNIV                   | 6.90        | 19.66                      | Khrennikov A, 2010, UBIQUITOUS QUANTUM STRUCTURE: FROM PSYCHOLOGY TO FINANCE | 10.34       | 24.16                      |
| TIME-PERCEPTION      | 5.75        | 18.79                      | UNIV TOKYO                      | 6.90        | 6.35                       | Penrose R, 1994, SHADOWS MIND                                                | 10.34       | 28.00                      |
| TSALLIS STATISTICS   | 5.75        | 13.10                      | DEPT LIFE SCI                   | 5.75        | 18.94                      | Piotrowski EW, 2001, ACTA PHYS POL B, 32, 3873                               | 10.34       | 28.00                      |
| BAYESIAN GAMES       | 4.60        | 16.80                      | KITA KU                         | 5.75        | 14.54                      | Pothos EM, 2009, P R SOC B, 276, 2171                                        | 10.34       | 25.27                      |
| BELL NONLOCALITY     | 4.60        | 16.80                      | MEGURO KU                       | 5.75        | 8.89                       | Aerts D, 2009, J MATH PSYCHOL, 53, 314                                       | 9.20        | 26.40                      |
| DELAY                | 4.60        | 9.89                       | SCH ARTS & SCI                  | 5.75        | 20.79                      | Brunner N, 2013, NAT COMMUN, 4, 0                                            | 9.20        | 26.40                      |
| GAME-THEORY          | 4.60        | 11.72                      | UNIT COGNIT & BEHAV SCI         | 5.75        | 20.79                      | Haven E, 2013, QUANTUM SOCIAL SCI                                            | 9.20        | 22.42                      |
| <b>Title Words</b>   | <b>f(%)</b> | <b><math>\sigma</math></b> | <b>COLL MATH &amp; INFORMAT</b> | <b>4.60</b> | <b>16.59</b>               | <b>RefJournal</b>                                                            | <b>f(%)</b> | <b><math>\sigma</math></b> |
| QUANTUM              | 57.47       | 46.86                      | <b>Country</b>                  | <b>f(%)</b> | <b><math>\sigma</math></b> | PHYSICA A                                                                    | 64.37       | 2.25                       |
| GAME                 | 11.49       | 4.05                       | Poland                          | 20.69       | 7.77                       | PHYS REV LETT                                                                | 48.28       | 0.04                       |
| GAMES                | 11.49       | 5.90                       | Japan                           | 16.09       | 5.14                       | PHYS LETT A                                                                  | 44.83       | 9.85                       |
| INFORMATION          | 11.49       | 3.70                       | UK                              | 16.09       | 3.14                       | PHYS REV A                                                                   | 33.33       | 11.46                      |
| MODEL                | 9.20        | -1.12                      | Sweden                          | 14.94       | 10.02                      | INT J THEOR PHYS                                                             | 31.03       | 33.68                      |
| SOCIAL               | 9.20        | -1.48                      | Peoples R China                 | 9.20        | -3.48                      | J MATH PSYCHOL                                                               | 29.89       | 19.27                      |
| INTERTEMPORAL        | 8.05        | 24.93                      | Belgium                         | 6.90        | 4.29                       | NATURE                                                                       | 22.99       | -4.23                      |
| QUANTUM-LIKE         | 8.05        | 24.93                      | USA                             | 6.90        | -3.11                      | REV MOD PHYS                                                                 | 22.99       | -1.84                      |
| THEORY               | 8.05        | 3.92                       | Australia                       | 4.60        | 1.94                       | FOUND PHYS                                                                   | 21.84       | 27.04                      |
| BASED                | 6.90        | 0.95                       | Spain                           | 4.60        | -0.30                      | ECONOMETRICA                                                                 | 20.69       | 5.22                       |
| <b>Journal</b>       | <b>f(%)</b> | <b><math>\sigma</math></b> | Brazil                          | 3.45        | -0.61                      | <b>Subject</b>                                                               | <b>f(%)</b> | <b><math>\sigma</math></b> |
| PHYSICA A            | 40.23       | 3.29                       | <b>Author</b>                   | <b>f(%)</b> | <b><math>\sigma</math></b> | Physics, Multidisciplinary                                                   | 81.61       | 5.84                       |
| INT J THEOR PHYS     | 11.49       | 23.41                      | Piotrowski EW                   | 16.09       | 31.01                      | Physics, Mathematical                                                        | 18.39       | -1.71                      |
| QUANTUM INF PROCESS  | 9.20        | 22.64                      | Sladkowski J                    | 14.94       | 29.62                      | Computer Science, Theory & Methods                                           | 8.05        | 5.10                       |
| AIP CONF PROC        | 4.60        | -0.65                      | Haven E                         | 12.64       | 29.90                      | Physics, Particles & Fields                                                  | 5.75        | 4.93                       |
| ENTROPY-SWITZ        | 4.60        | 2.44                       | Khrennikov A                    | 12.64       | 28.70                      | Optics                                                                       | 4.60        | 2.31                       |
| FOUND PHYS           | 4.60        | 16.81                      | Takahashi T                     | 11.49       | 26.06                      | Physics, Atomic, Molecular & Chemical                                        | 4.60        | 3.34                       |
| PHYS REV A           | 4.60        | 11.14                      | Aerts D                         | 6.90        | 23.08                      | Computer Science, Interdisciplinary Applications                             | 3.45        | -0.34                      |
| INT J QUANTUM INF    | 3.45        | 12.55                      | Sozzo S                         | 4.60        | 18.84                      | Multidisciplinary Sciences                                                   | 3.45        | -0.01                      |
| LECT NOTES COMPUT SC | 3.45        | 6.50                       | Chen KY                         | 3.45        | 16.32                      | Statistics & Probability                                                     | 3.45        | 3.08                       |
| OPEN SYST INF DYN    | 2.30        | 6.92                       | D'hooghe B                      | 3.45        | 16.32                      | Mechanics                                                                    | 2.30        | -0.72                      |
|                      |             |                            | Hogg T                          | 3.45        | 11.41                      |                                                                              |             |                            |

**Cluster 10 (“INTERTEMPORAL CHOICE”).** Most cited publications (according to Web Of Science) and most representative publications (in term of in-degree  $d_{in}$  measuring the number of publications in the cluster that are linked with it) among all publications in the cluster.

| <b>Most Cited publications</b>          |             |                                           |                                                                                                                     |
|-----------------------------------------|-------------|-------------------------------------------|---------------------------------------------------------------------------------------------------------------------|
| $d_{in}$                                | Times Cited | Publication Ref                           | Publication Title                                                                                                   |
| 24                                      | 97          | Piotrowski EW, 2003, INT J THEOR PHYS(42) | An invitation to quantum game theory                                                                                |
| 14                                      | 74          | Takahashi T, 2008, PHYSICA A(387)         | Psychophysics of time perception and intertemporal choice models                                                    |
| 2                                       | 73          | Khrennikov A, 1999, FOUND PHYS(29)        | Classical and quantum mechanics on information spaces with applications to cognitive, psychological, social, and... |
| 4                                       | 63          | Piotrowski EW, 2002, PHYSICA A(312)       | Quantum market games                                                                                                |
| 4                                       | 52          | Khrennikov A, 2004, OPEN SYST INF DYN(11) | On quantum-like probabilistic structure of mental information                                                       |
| 14                                      | 50          | Iqbal A, 2002, PHYS REV A(65)             | Backwards-induction outcome in a quantum game                                                                       |
| 5                                       | 40          | Cajueiro DO, 2006, PHYSICA A(364)         | A note on the relevance of the q-exponential function in the context of intertemporal choices                       |
| 4                                       | 35          | Aerts D, 2011, LECT NOTES COMPUT SC(7052) | Quantum Structure in Cognition: Why and How Concepts Are Entangled                                                  |
| 15                                      | 31          | Asano M, 2012, PHYSICA A(391)             | Quantum-like dynamics of decision-making                                                                            |
| 11                                      | 30          | Takahashi T, 2007, PHYSICA A(385)         | A comparison of intertemporal choices for oneself versus someone else based on Tsallis' statistics                  |
| 17                                      | 29          | Chen KY, 2002, QUANTUM INF PROCESS(1)     | A Quantum Treatment of Public Goods Economics                                                                       |
| 5                                       | 28          | Piotrowski EW, 2001, ACTA PHYS POL B(32)  | Quantum-like approach to financial risk: Quantum anthropic principle                                                |
| 14                                      | 27          | Han RK, 2012, PHYSICA A(391)              | Psychophysics of time perception and valuation in temporal discounting of gain and loss                             |
| 11                                      | 27          | Accardi L, 2009, OPEN SYST INF DYN(16)    | Quantum Markov Model for Data from Shafir-Tversky Experiments in Cognitive Psychology                               |
| <b>Most Representative Publications</b> |             |                                           |                                                                                                                     |
| $d_{in}$                                | Times Cited | Publication Ref                           | Publication Title                                                                                                   |
| 32                                      | 14          | Iqbal A, 2015, PHYSICA A(436)             | Social optimality in quantum Bayesian games                                                                         |
| 26                                      | 11          | Hanauske M, 2007, PHYSICA A(382)          | Quantum game theory and open access publishing                                                                      |
| 24                                      | 97          | Piotrowski EW, 2003, INT J THEOR PHYS(42) | An invitation to quantum game theory                                                                                |
| 24                                      | 3           | Arfi B, 2007, PHYSICA A(374)              | Quantum social game theory                                                                                          |
| 23                                      | 2           | Situ HZ, 2017, INT J QUANTUM INF(15)      | Land bidding game with conflicting interest and its quantum solution                                                |
| 21                                      | 2           | Bang J, 2016, SCI REP-UK(6)               | Quantum-mechanical machinery for rational decision-making in classical guessing game                                |
| 20                                      | 9           | Hanauske M, 2010, PHYSICA A(389)          | Doves and hawks in economics revisited: An evolutionary quantum game theory based analysis of financial crises      |
| 18                                      | 5           | Makowski M, 2015, ENTROPY-SWITZ(17)       | Do Transitive Preferences Always Result in Indifferent Divisions?                                                   |
| 17                                      | 29          | Chen KY, 2002, QUANTUM INF PROCESS(1)     | A Quantum Treatment of Public Goods Economics                                                                       |
| 17                                      | 24          | Piotrowski EW, 2002, PHYSICA A(308)       | Quantum bargaining games                                                                                            |
| 17                                      | 21          | Chen KY, 2006, QUANTUM INF PROCESS(5)     | How well do people play a quantum prisoner's dilemma?                                                               |
| 17                                      | 18          | Piotrowski EW, 2005, PHYSICA A(345)       | Quantum diffusion of prices and profits                                                                             |
| 17                                      | 7           | Piotrowski EW, 2004, INT J QUANTUM INF(2) | Quantum computer: An appliance for playing market games                                                             |
| 16                                      | 16          | Piotrowski EW, 2003, PHYSICA A(318)       | Interference of quantum market strategies                                                                           |

**Cluster 10 (“INTERTEMPORAL CHOICE”)**. Most cited and representative authors. For each author, we display the number  $N_a$  of publications their authored in that cluster, the sum  $TC_a$  of their number of citations (according to Web Of Science), and the sum  $k_a$  of their in-degree.

| <b>Most Cited Authors</b> |       |        |       |
|---------------------------|-------|--------|-------|
| <b>Author</b>             | $N_a$ | $TC_a$ | $k_a$ |
| Sladkowski J              | 13    | 331    | 161   |
| Piotrowski EW             | 14    | 325    | 163   |
| Takahashi T               | 10    | 198    | 116   |
| Khrennikov A              | 11    | 177    | 106   |
| Oono H                    | 2     | 99     | 24    |
| Radford MHB               | 2     | 99     | 24    |
| Haven E                   | 11    | 86     | 69    |
| Ohya M                    | 3     | 76     | 39    |
| Aerts D                   | 6     | 75     | 50    |
| Khrennivov A              | 1     | 73     | 2     |
| Iqbal A                   | 2     | 64     | 46    |
| Sozzo S                   | 4     | 58     | 31    |
| Chen KY                   | 3     | 57     | 45    |
| Hogg T                    | 3     | 57     | 45    |
| Toor AH                   | 1     | 50     | 14    |
| Tanaka Y                  | 2     | 49     | 28    |
| Basieva I                 | 2     | 49     | 28    |
| Asano M                   | 2     | 49     | 28    |
| Khrennikova P             | 3     | 40     | 32    |

| <b>Most Representative Authors</b> |       |        |       |
|------------------------------------|-------|--------|-------|
| <b>Author</b>                      | $N_a$ | $TC_a$ | $k_a$ |
| Piotrowski EW                      | 14    | 325    | 163   |
| Sladkowski J                       | 13    | 331    | 161   |
| Takahashi T                        | 10    | 198    | 116   |
| Khrennikov A                       | 11    | 177    | 106   |
| Haven E                            | 11    | 86     | 69    |
| Aerts D                            | 6     | 75     | 50    |
| Iqbal A                            | 2     | 64     | 46    |
| Bernius S                          | 2     | 20     | 46    |
| Hanauske M                         | 2     | 20     | 46    |
| Chen KY                            | 3     | 57     | 45    |
| Hogg T                             | 3     | 57     | 45    |
| Situ HZ                            | 3     | 16     | 42    |
| Zhang C                            | 3     | 16     | 42    |
| Ohya M                             | 3     | 76     | 39    |
| Alonso-Sanz R                      | 2     | 9      | 36    |
| Li LZ                              | 2     | 2      | 36    |
| Khrennikova P                      | 3     | 40     | 32    |
| Abbott D                           | 1     | 14     | 32    |
| Chappell JM                        | 1     | 14     | 32    |
